# Supplementary material for: Alkyl 4-Aryl-6-amino-7- phenyl-3-(phenylimino)-4,7-dihydro- 3H-[1,2]dithiolo[3,4-b]pyridine-5-carboxylates: Synthesis and Agrochemical Studies
Source: MDPI journal article supplement (doi:10.3390/molecules28020609), 2023-01-06

# Alkyl 4-aryl-6-amino-7- phenyl-3-(phenylimino)-4,7-dihydro-3H-[1,2]dithiolo[3,4-b]pyridine-5-carboxylates: Synthesis and Agrochemical Studies

Victor V. Dotsenko <sup>1,2,\*</sup>, Anna E. Sinotsko <sup>1</sup>, Vladimir D. Strelkov <sup>1</sup>, Ekaterina A. Varzieva <sup>1</sup>, Alena A. Russkikh <sup>1</sup>, Arina G. Levchenko <sup>1</sup>, Azamat Z. Temerdashev <sup>3</sup>, Nicolai A. Aksenov <sup>2</sup> and Inna V. Aksenova <sup>2</sup>

<sup>1</sup> Department of Organic Chemistry and Technologies, Kuban State University, 350040 Krasnodar, Russia

<sup>2</sup> Department of Chemistry, North Caucasus Federal University, 355017 Stavropol, Russia

<sup>3</sup> Department of Analytical Chemistry, Kuban State University, 350040 Krasnodar, Russia

\*Correspondence: victor\_dotsenko\_@mail.ru (V.V.D.).

## Contents. Selected spectral and X-Ray data

|                                                                                                                                                                                                                                                              |    |
|--------------------------------------------------------------------------------------------------------------------------------------------------------------------------------------------------------------------------------------------------------------|----|
| Figure S1. FTIR spectrum of dithiopyridine 15a .....                                                                                                                                                                                                         | 3  |
| Figure S2. <sup>1</sup> H NMR spectrum of dithiopyridine 15a, DMSO-d <sub>6</sub> (400 MHz).....                                                                                                                                                             | 3  |
| Figure S3. <sup>13</sup> C DEPTQ NMR spectrum of dithiopyridine 15a, DMSO-d <sub>6</sub> (101 MHz) .....                                                                                                                                                     | 4  |
| Figure S4. <sup>1</sup> H- <sup>13</sup> C HSQC NMR spectrum of the dithiopyridine 15a, DMSO-d <sub>6</sub> (400/101 MHz) .....                                                                                                                              | 4  |
| Figure S5. <sup>1</sup> H- <sup>13</sup> C HMBC NMR spectrum of the dithiopyridine 15a, DMSO-d <sub>6</sub> (400/101 MHz) .....                                                                                                                              | 5  |
| Figure S6. <sup>1</sup> H- <sup>13</sup> C HMBC NMR spectrum of the dithiopyridine 15a, DMSO-d <sub>6</sub> (400/101 MHz) ( <i>fragments</i> ) .....                                                                                                         | 6  |
| Table S1. The observed correlations in the <sup>1</sup> H- <sup>13</sup> C HSQC and <sup>1</sup> H- <sup>13</sup> C HMBC 2D NMR spectra of dithiopyridine 15a .....                                                                                          | 7  |
| Figure S7. ORTEP drawings of the crystal structure showing 50% probability thermal ellipsoids (CCDC 2219352) of the single crystal of compound 15a. ....                                                                                                     | 8  |
| Table S2. Crystal data and structure refinement for dithiopyridine 15a .....                                                                                                                                                                                 | 8  |
| Table S3. Fractional Atomic Coordinates (×10 <sup>4</sup> ) and Equivalent Isotropic Displacement Parameters (Å <sup>2</sup> ×10 <sup>3</sup> ) for 15a. U <sub>eq</sub> is defined as 1/3 of of the trace of the orthogonalised U <sub>ij</sub> tensor..... | 9  |
| Table S4. Anisotropic Displacement Parameters (Å <sup>2</sup> ×10 <sup>3</sup> ) for 15a. The Anisotropic displacement factor exponent takes the form: -2π <sup>2</sup> [h <sup>2</sup> a <sup>2</sup> U <sub>11</sub> +...+2hka×b×U <sub>12</sub> ] .....   | 10 |
| Table S5. Bond Lengths for dithiopyridine 15a. ....                                                                                                                                                                                                          | 11 |
| Table S6. Bond Angles for dithiopyridine 15a.....                                                                                                                                                                                                            | 11 |
| Table S7. Hydrogen Atom Coordinates (Å×10 <sup>4</sup> ) and Isotropic Displacement Parameters (Å <sup>2</sup> ×10 <sup>3</sup> ) for 15a. ....                                                                                                              | 12 |

|                                                                                                                                                                   |    |
|-------------------------------------------------------------------------------------------------------------------------------------------------------------------|----|
| Figure S8. FTIR spectrum of dithiopyridine 15b .....                                                                                                              | 13 |
| Figure S9. $^1\text{H}$ NMR spectrum of dithiopyridine 15b, DMSO- $\text{d}_6$ (400 MHz) .....                                                                    | 13 |
| Figure S10. $^{13}\text{C}$ DEPTQ NMR spectrum of dithiopyridine 15b, DMSO- $\text{d}_6$ (101 MHz) .....                                                          | 14 |
| Figure S11. FTIR spectrum of dithiopyridine 15c .....                                                                                                             | 14 |
| Figure S12. $^1\text{H}$ NMR spectrum of dithiopyridine 15c, DMSO- $\text{d}_6$ (400 MHz) .....                                                                   | 15 |
| Figure S13. $^{13}\text{C}$ DEPTQ NMR spectrum of dithiopyridine 15c, DMSO- $\text{d}_6$ (101 MHz) .....                                                          | 15 |
| Figure S14. $^1\text{H}$ - $^{13}\text{C}$ HSQC NMR spectrum of the dithiopyridine 15c, DMSO- $\text{d}_6$ (400/101 MHz) .....                                    | 16 |
| Figure S15. $^1\text{H}$ - $^{13}\text{C}$ HMBC NMR spectrum of the dithiopyridine 15c, DMSO- $\text{d}_6$ (400/101 MHz) .....                                    | 17 |
| Figure S16. $^1\text{H}$ - $^{13}\text{C}$ HMBC NMR spectrum of the dithiopyridine 15c, DMSO- $\text{d}_6$ (400/101 MHz) (fragment) .....                         | 18 |
| Table S8. The observed correlations in the $^1\text{H}$ - $^{13}\text{C}$ HSQC and $^1\text{H}$ - $^{13}\text{C}$ HMBC 2D NMR spectra of dithiopyridine 15c ..... | 19 |
| Figure S17. FTIR spectrum of dithiopyridine 15d .....                                                                                                             | 20 |
| Figure S18. $^1\text{H}$ NMR spectrum of dithiopyridine 15d, DMSO- $\text{d}_6$ (400 MHz) .....                                                                   | 20 |
| Figure S19. $^{13}\text{C}$ DEPTQ NMR spectrum of dithiopyridine 15d, DMSO- $\text{d}_6$ (101 MHz) .....                                                          | 21 |
| Figure S20. FTIR spectrum of dithiopyridine 15f .....                                                                                                             | 21 |
| Figure S21. $^1\text{H}$ NMR spectrum of dithiopyridine 15f, DMSO- $\text{d}_6$ (400 MHz) .....                                                                   | 22 |
| Figure S22. $^{13}\text{C}$ DEPTQ NMR spectrum of dithiopyridine 15f, DMSO- $\text{d}_6$ (101 MHz) .....                                                          | 22 |
| Figure S23. $^1\text{H}$ - $^{13}\text{C}$ HSQC NMR spectrum of the dithiopyridine 15f, DMSO- $\text{d}_6$ (400/101 MHz) .....                                    | 23 |
| Figure S24. $^1\text{H}$ - $^{13}\text{C}$ HMBC NMR spectrum of the dithiopyridine 15f, DMSO- $\text{d}_6$ (400/101 MHz) .....                                    | 24 |
| Figure S25. $^1\text{H}$ - $^{13}\text{C}$ HMBC NMR spectrum of the dithiopyridine 15f, DMSO- $\text{d}_6$ (400/101 MHz) (fragment) .....                         | 25 |
| Table S9. The observed correlations in the $^1\text{H}$ - $^{13}\text{C}$ HSQC and $^1\text{H}$ - $^{13}\text{C}$ HMBC 2D NMR spectra of dithiopyridine 15f ..... | 26 |
| Figure S26. HRMS spectrum of dithiopyridine 15a .....                                                                                                             | 27 |
| Figure S27. HRMS spectrum of dithiopyridine 15b .....                                                                                                             | 27 |
| Figure S28. HRMS spectrum of dithiopyridine 15c .....                                                                                                             | 28 |
| Figure S29. HRMS spectrum of dithiopyridine 15d .....                                                                                                             | 28 |
| Figure S30. HRMS spectrum of dithiopyridine 15e .....                                                                                                             | 29 |
| Figure S31. HRMS spectrum of dithiopyridine 15f .....                                                                                                             | 29 |

Figure S1. FTIR spectrum of dithiopyridine 15a

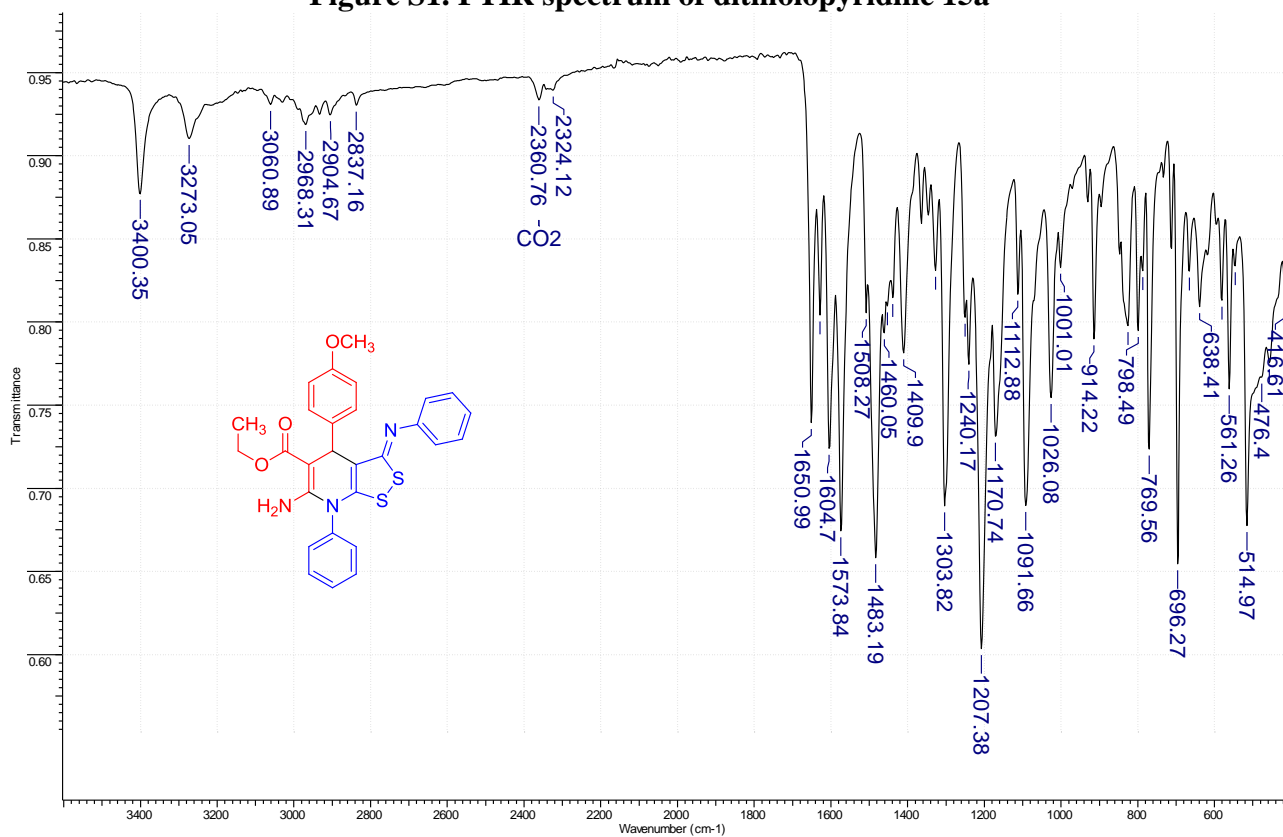

Figure S2. <sup>1</sup>H NMR spectrum of dithiopyridine 15a, DMSO-d<sub>6</sub> (400 MHz)

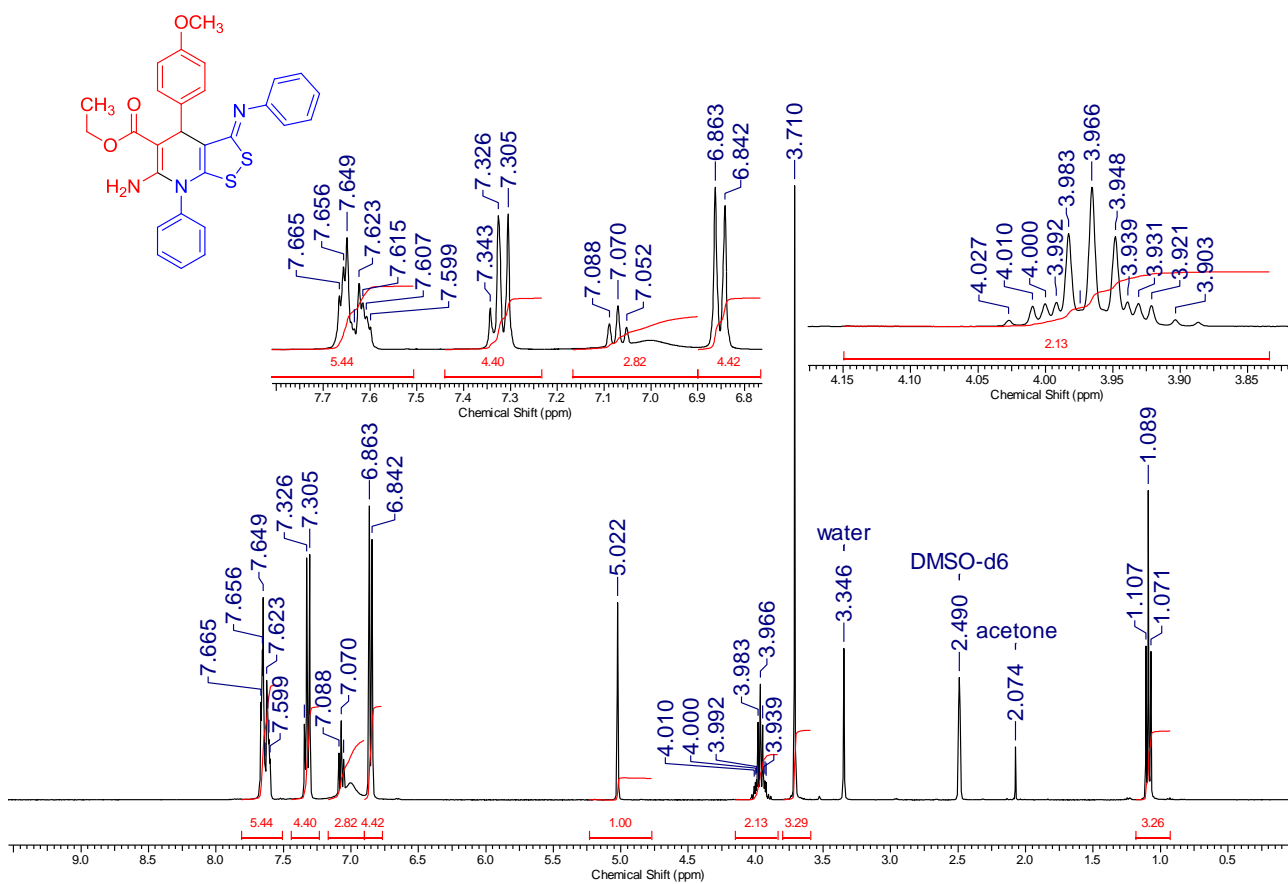

[illegible]

**Figure S5.  $^1\text{H}$ - $^{13}\text{C}$  HMBC NMR spectrum of the dithiolopyridine 15a, DMSO- $\text{d}_6$  (400/101 MHz)**

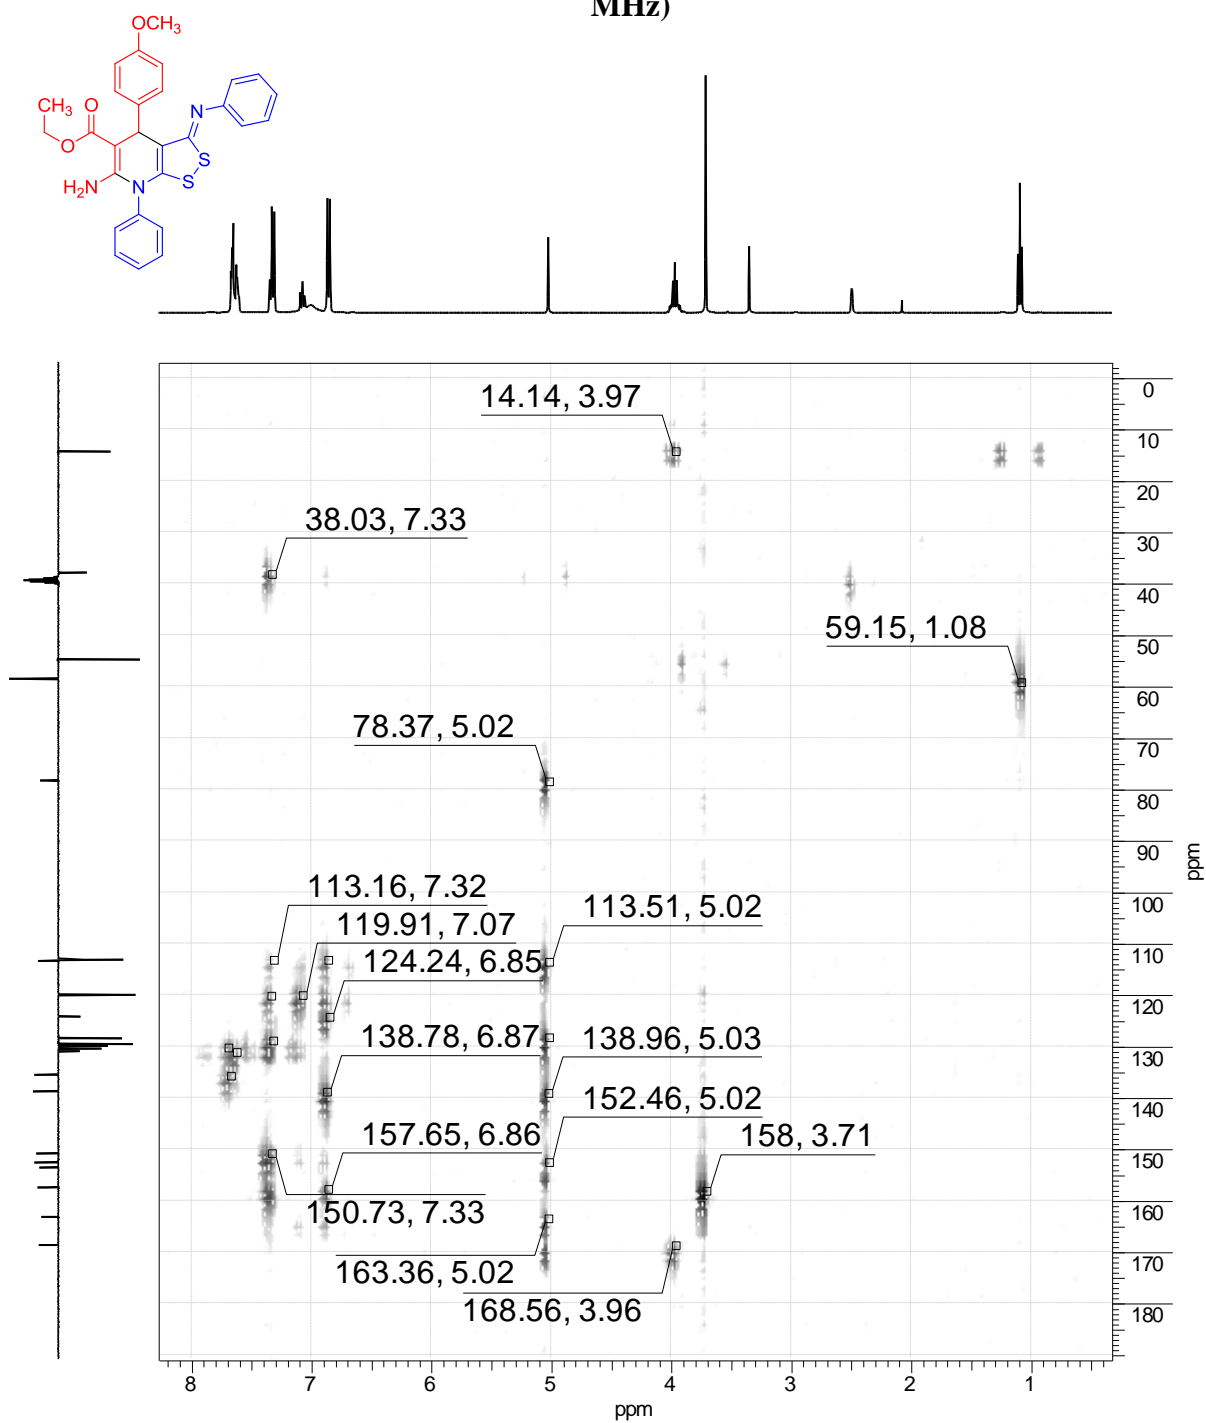

**Figure S6.  $^1\text{H}$ - $^{13}\text{C}$  HMBC NMR spectrum of the dithiolopyridine 15a, DMSO- $\text{d}_6$  (400/101 MHz) (fragments)**

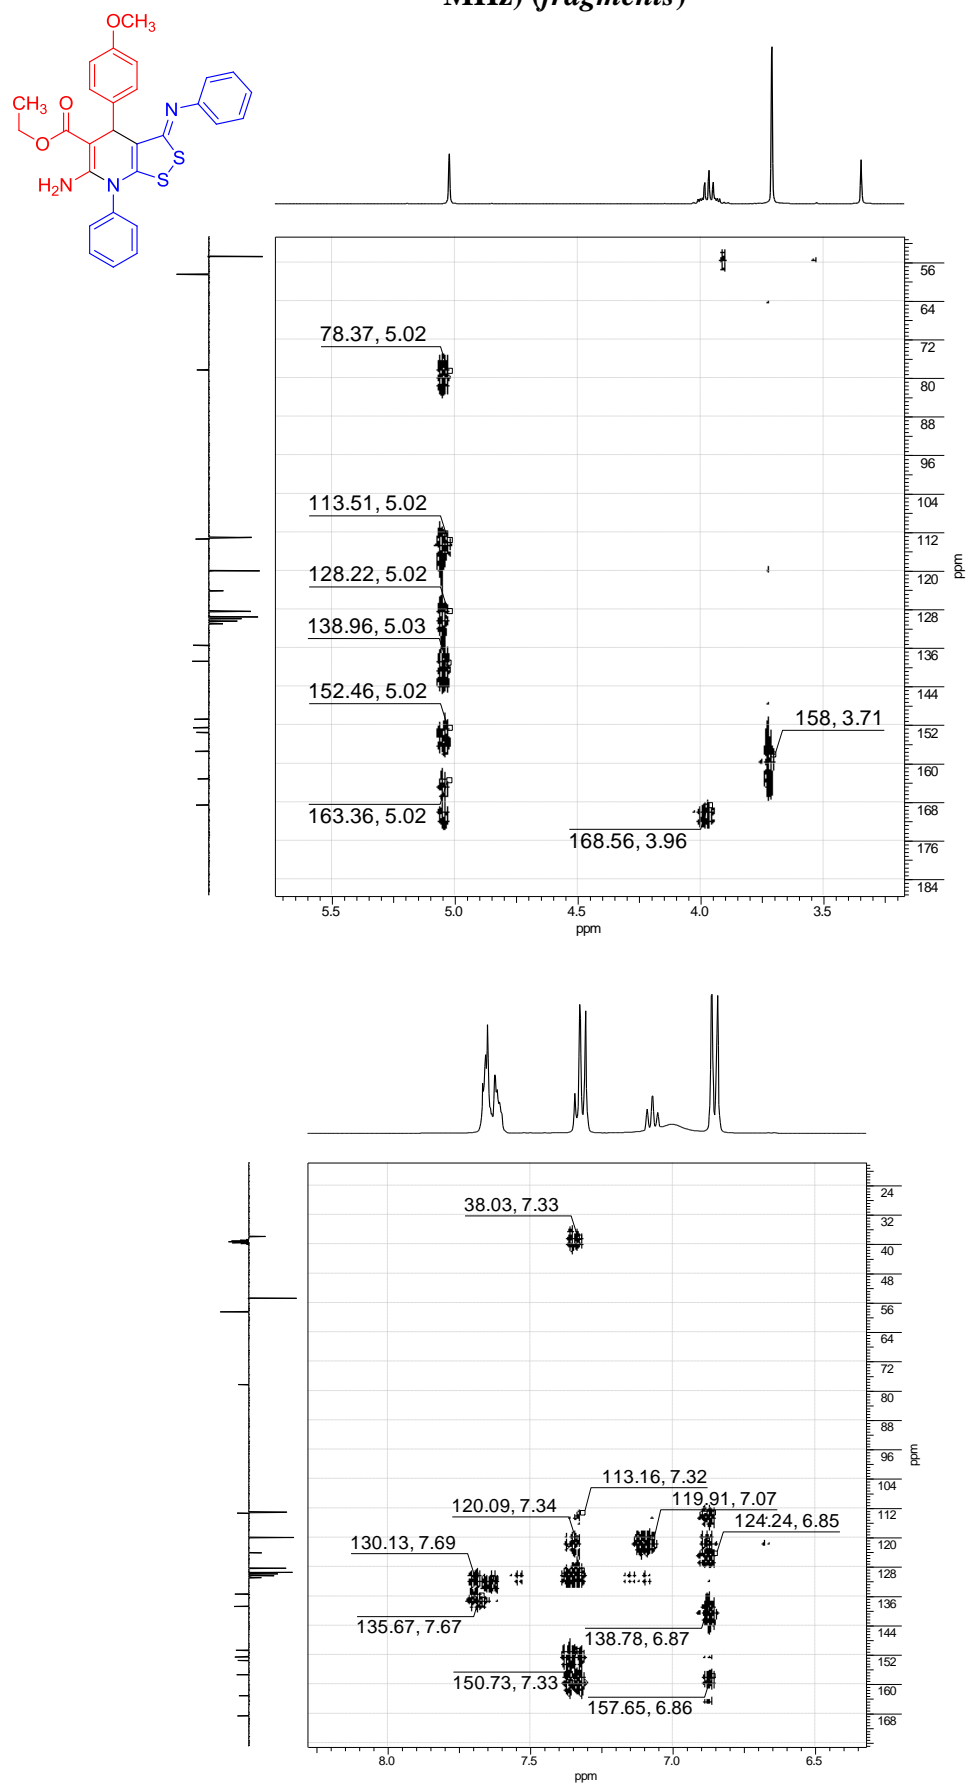

**Table S1. The observed correlations in the  $^1\text{H}$ - $^{13}\text{C}$  HSQC and  $^1\text{H}$ - $^{13}\text{C}$  HMBC 2D NMR spectra of dithiopyridine 15a**

$^{13}\text{C}$  chemical shifts are given in **red**,  $^1\text{H}$  shifts – in **blue**

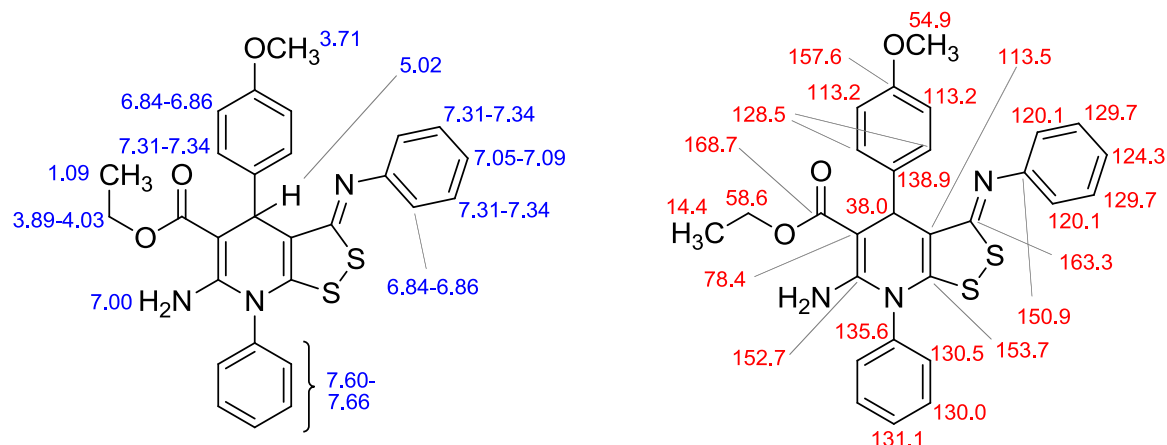

| $^1\text{H}$ NMR shifts, $\delta$ , ppm                 | Correlations in HSQC spectrum, $\delta$ , ppm  | Correlations in HMBC spectrum, $\delta$ , ppm                                                                     |
|---------------------------------------------------------|------------------------------------------------|-------------------------------------------------------------------------------------------------------------------|
| 1.09 (t, $^3J = 7.1$ Hz, 3H, $\text{CH}_3\text{CH}_2$ ) | 14.4* ( $\text{CH}_3$ )                        | 58.6 ( $\text{OCH}_2$ )                                                                                           |
| 3.71 (s, 3H, MeO)                                       | 54.9* ( $\text{OCH}_3$ )                       | 157.6 (C-OMe)                                                                                                     |
| 3.89–4.03 (m, 2H, $\text{CH}_3\text{CH}_2$ )            | 58.6 ( $\text{OCH}_2$ )                        | 14.4* ( $\text{CH}_3$ ), 168.7 (C=O)                                                                              |
| 5.02 (s, 1H, H-4)                                       | 38.0* (C-4)                                    | 78.4 (C-5), 113.5 (C-3a), 128.5* (2C, CH Ar), 138.9 (C-1 Ar), 152.7 (C-6), 153.7 (C-8a), 163.3 (C=N), 168.7 (C=O) |
| 6.84–6.86 (m, 4H, H Ar)                                 | 113.2* (2C, CH Ar)<br>120.1* (2C, CH Ar)       | 113.2* (2C, CH Ar), 120.1* (2C, CH Ar), 124.3* (CH Ar), 138.9 (C-1 Ar), 157.6 (C-OMe)                             |
| 7.00 (very br s, 2H, $\text{NH}_2$ )                    | —                                              | —                                                                                                                 |
| 7.05–7.09 (m, 1H, H-4 Ph)                               | 124.3* (CH Ar)                                 | 120.1* (2C, CH Ar), 129.7* (2C, CH Ar)                                                                            |
| 7.31–7.34 (m, 4H, H Ar)                                 | 128.5* (2C, CH Ar),<br>129.7* (2C, CH Ar)      | 38.0* (C-4), 113.2* (2C, CH Ar), 128.5* (2C, CH Ar), 129.7* (2C, CH Ar), 150.9 (C-1 Ph), 157.6 (C-OMe)            |
| 7.60–7.66 (m, 5H, H Ar)                                 | 130.0* (CH Ar), 130.5* (CH Ar), 131.1* (CH Ar) | 130.0* (CH Ar), 130.5* (CH Ar), 131.1* (CH Ar), 135.6 (C-1 Ph)                                                    |

\*Signals with a negative phase.

**Figure S7. ORTEP drawings of the crystal structure showing 50% probability thermal ellipsoids (CCDC 2219352) of the single crystal of compound 15a.**

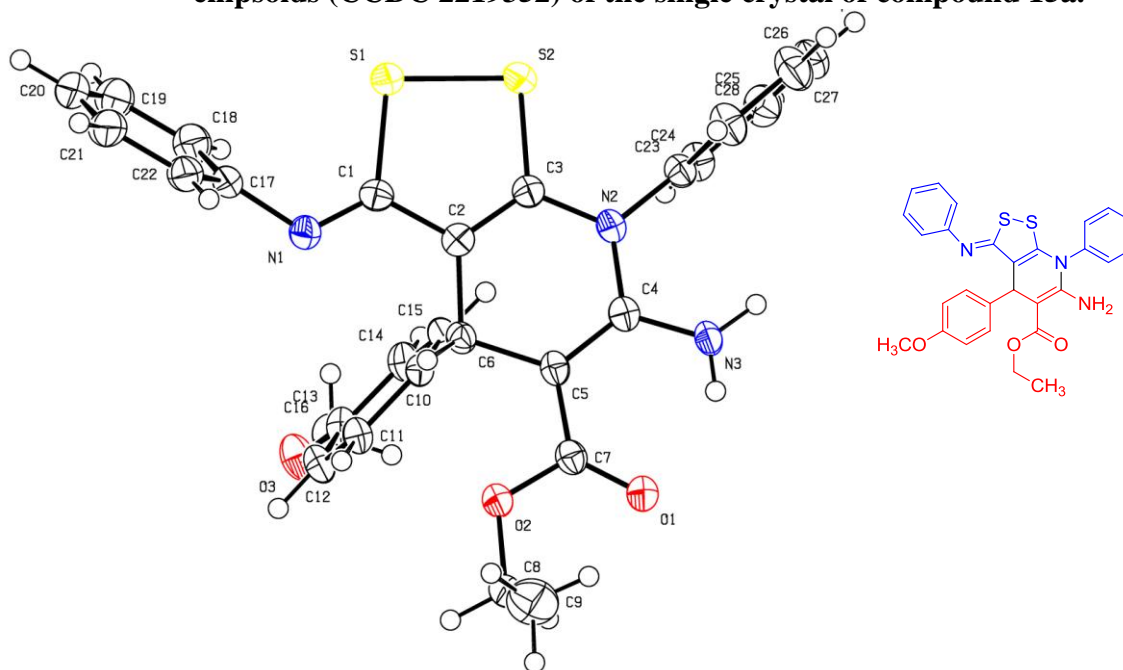

**Table S2. Crystal data and structure refinement for dithiolopyridine 15a**

|                                             |                                                                              |
|---------------------------------------------|------------------------------------------------------------------------------|
| Empirical formula                           | C <sub>28</sub> H <sub>25</sub> N <sub>3</sub> O <sub>3</sub> S <sub>2</sub> |
| Formula weight                              | 515.63                                                                       |
| Temperature/K                               | 423.15(10)                                                                   |
| Crystal system                              | orthorhombic                                                                 |
| Space group                                 | P2 <sub>1</sub> 2 <sub>1</sub> 2 <sub>1</sub>                                |
| a/Å                                         | 10.2422(4)                                                                   |
| b/Å                                         | 12.9088(5)                                                                   |
| c/Å                                         | 19.2052(7)                                                                   |
| α/°                                         | 90                                                                           |
| β/°                                         | 90                                                                           |
| γ/°                                         | 90                                                                           |
| Volume/Å <sup>3</sup>                       | 2539.21(17)                                                                  |
| Z                                           | 4                                                                            |
| ρ <sub>calc</sub> /mg/mm <sup>3</sup>       | 1.349                                                                        |
| m/mm <sup>-1</sup>                          | 2.190                                                                        |
| F(000)                                      | 1080.0                                                                       |
| Crystal size/mm <sup>3</sup>                | 0.421 × 0.288 × 0.13                                                         |
| 2θ range for data collection                | 8.252 to 144.204°                                                            |
| Index ranges                                | -11 ≤ h ≤ 12, -15 ≤ k ≤ 15, -23 ≤ l ≤ 23                                     |
| Reflections collected                       | 21592                                                                        |
| Independent reflections                     | 4994[R(int) = 0.0510]                                                        |
| Data/restraints/parameters                  | 4994/0/311                                                                   |
| Goodness-of-fit on F <sup>2</sup>           | 1.029                                                                        |
| Final R indexes [I ≥ 2σ (I)]                | R <sub>1</sub> = 0.0379, wR <sub>2</sub> = 0.1016                            |
| Final R indexes [all data]                  | R <sub>1</sub> = 0.0394, wR <sub>2</sub> = 0.1035                            |
| Largest diff. peak/hole / e Å <sup>-3</sup> | 0.46/-0.29                                                                   |
| Flack parameter                             | 0.010(9)                                                                     |



**Table S3. Fractional Atomic Coordinates ( $\times 10^4$ ) and Equivalent Isotropic Displacement Parameters ( $\text{\AA}^2 \times 10^3$ ) for 15a.  $U_{\text{eq}}$  is defined as 1/3 of the trace of the orthogonalised  $U_{ij}$  tensor.**

| Atom | x          | y          | z          | U(eq)     |
|------|------------|------------|------------|-----------|
| S2   | 2865.5(7)  | 4442.3(5)  | 3910.5(3)  | 29.60(18) |
| S1   | 4510.7(7)  | 5224.8(5)  | 4252.7(3)  | 29.65(18) |
| O1   | 2480(2)    | 5596.0(16) | 499.5(11)  | 32.1(4)   |
| O2   | 4361(2)    | 6358.5(17) | 822(1)     | 33.4(5)   |
| O3   | 8936(2)    | 3081.9(16) | 1367.1(13) | 37.3(5)   |
| N2   | 2229(2)    | 4397.6(18) | 2556.8(12) | 27.4(5)   |
| N3   | 1219(2)    | 4541.9(18) | 1482.7(14) | 27.2(5)   |
| N1   | 6032(2)    | 6244.4(18) | 3318.2(13) | 28.4(5)   |
| C5   | 3322(3)    | 5354(2)    | 1648.2(14) | 24.7(5)   |
| C7   | 3315(3)    | 5753(2)    | 950.9(15)  | 26.9(5)   |
| C12  | 7815(3)    | 4662(2)    | 1378.9(16) | 31.4(6)   |
| C6   | 4522(3)    | 5537(2)    | 2106.1(13) | 24.3(5)   |
| C15  | 5693(3)    | 3799(2)    | 2044.4(15) | 27.9(6)   |
| C10  | 5682(3)    | 4858(2)    | 1896.6(13) | 23.4(5)   |
| C11  | 6758(3)    | 5272(2)    | 1557.4(14) | 27.9(6)   |
| C4   | 2280(3)    | 4768(2)    | 1874.9(14) | 24.6(5)   |
| C14  | 6750(3)    | 3177(2)    | 1876.6(16) | 30.6(6)   |
| C17  | 6848.6(18) | 6485.0(14) | 3899.1(9)  | 28.6(6)   |
| C22  | 6931(2)    | 7505.1(12) | 4126.5(10) | 35.2(7)   |
| C21  | 7765(2)    | 7762.5(13) | 4670.6(10) | 45.0(9)   |
| C20  | 8517(2)    | 6999.7(18) | 4987.2(10) | 48.2(9)   |
| C19  | 8435(2)    | 5979.6(16) | 4759.7(11) | 47.5(9)   |
| C18  | 7600(2)    | 5722.2(12) | 4215.7(11) | 39.0(7)   |
| C2   | 4175(3)    | 5336(2)    | 2857.1(14) | 25.0(5)   |
| C3   | 3144(3)    | 4759(2)    | 3035.6(14) | 24.8(5)   |
| C1   | 5034(3)    | 5677(2)    | 3407.7(14) | 25.5(5)   |
| C23  | 1249.7(16) | 3684.9(12) | 2781.4(10) | 26.5(5)   |
| C24  | 1490.5(16) | 2626.9(13) | 2740.1(11) | 31.2(6)   |
| C25  | 562(2)     | 1925.4(10) | 2978.0(12) | 38.1(7)   |
| C26  | -606.2(18) | 2281.8(13) | 3257.2(12) | 40.7(7)   |
| C27  | -847.0(16) | 3339.7(15) | 3298.5(12) | 43.4(8)   |
| C28  | 80.9(18)   | 4041.3(10) | 3060.7(12) | 35.5(7)   |
| C13  | 7822(3)    | 3614(2)    | 1544.9(15) | 29.2(6)   |
| C16  | 8864(3)    | 1975(2)    | 1379.7(19) | 37.9(7)   |
| C8   | 4462(3)    | 6809(3)    | 134.3(16)  | 40.7(7)   |
| C9   | 3610(5)    | 7752(3)    | 60(2)      | 59.4(11)  |

**Table S4. Anisotropic Displacement Parameters ( $\text{\AA}^2 \times 10^3$ ) for 15a. The Anisotropic displacement factor exponent takes the form:  $-2\pi^2[h^2a^{*2}U_{11}+...+2hka \times b \times U_{12}]$**

| Atom | U <sub>11</sub> | U <sub>22</sub> | U <sub>33</sub> | U <sub>23</sub> | U <sub>13</sub> | U <sub>12</sub> |
|------|-----------------|-----------------|-----------------|-----------------|-----------------|-----------------|
| S2   | 29.4(3)         | 32.6(3)         | 26.8(3)         | 2.0(3)          | 3.2(3)          | -6.0(3)         |
| S1   | 29.5(4)         | 34.0(3)         | 25.4(3)         | -1.4(2)         | 1.0(3)          | -4.3(3)         |
| O1   | 28.3(10)        | 37.3(11)        | 30.8(10)        | 1.8(8)          | -2.9(8)         | -6.7(8)         |
| O2   | 26.1(11)        | 44.2(11)        | 29.9(10)        | 7.1(9)          | -2.3(8)         | -9.2(9)         |
| O3   | 25.3(10)        | 30.2(11)        | 56.4(14)        | -5.3(9)         | 5.3(10)         | 2.0(8)          |
| N2   | 24.7(12)        | 28.4(11)        | 29.1(11)        | 0.6(9)          | 0.6(9)          | -6.7(10)        |
| N3   | 20.2(11)        | 30.1(12)        | 31.4(12)        | 1.9(10)         | -0.4(9)         | -5.6(9)         |
| N1   | 27.9(12)        | 29.3(12)        | 28.0(11)        | -2.2(9)         | -0.1(10)        | -4.4(10)        |
| C5   | 20.3(12)        | 23.7(12)        | 30.1(13)        | -2.8(10)        | 0.7(10)         | -0.3(10)        |
| C7   | 22.7(13)        | 27.2(13)        | 30.8(13)        | -1.4(11)        | 2.0(11)         | 0.6(10)         |
| C12  | 23.2(14)        | 32.0(14)        | 39.0(15)        | -2.1(12)        | 4.2(12)         | -5.6(11)        |
| C6   | 23.9(12)        | 22.5(11)        | 26.3(12)        | -0.5(9)         | 0.7(11)         | -3.3(10)        |
| C15  | 22.7(14)        | 28.7(13)        | 32.4(14)        | 1.6(11)         | 1.7(11)         | -3(1)           |
| C10  | 21.1(13)        | 24.2(12)        | 24.9(12)        | -1.4(10)        | -1.8(10)        | -1.8(10)        |
| C11  | 24.5(14)        | 25.8(12)        | 33.4(14)        | -1.1(11)        | -0.8(11)        | -4.4(11)        |
| C4   | 22.1(13)        | 21.4(11)        | 30.4(13)        | -1.7(10)        | 0.6(10)         | 2.8(10)         |
| C14  | 29.2(15)        | 24.5(12)        | 38.1(15)        | -1.8(11)        | -1.3(12)        | -1.8(11)        |
| C17  | 25.2(14)        | 34.6(14)        | 26.1(13)        | -0.4(11)        | 1.7(11)         | -7.4(11)        |
| C22  | 40.6(17)        | 33.9(14)        | 31.2(14)        | -0.7(12)        | 0.7(13)         | -10.9(13)       |
| C21  | 56(2)           | 47.1(19)        | 32.1(15)        | -4.1(13)        | -0.7(15)        | -24.4(17)       |
| C20  | 44(2)           | 69(2)           | 31.2(16)        | 1.3(15)         | -3.9(14)        | -23.8(17)       |
| C19  | 32.7(18)        | 68(2)           | 42.3(18)        | 11.8(16)        | -4.2(15)        | 1.2(16)         |
| C18  | 34.2(16)        | 42.0(17)        | 40.6(16)        | 0.3(13)         | 1.0(14)         | 1.0(13)         |
| C2   | 26.9(14)        | 21.4(12)        | 26.6(13)        | -1.2(10)        | -0.1(10)        | 1.7(10)         |
| C3   | 25.1(13)        | 23.6(12)        | 25.8(12)        | -2.1(10)        | 1.2(10)         | 1(1)            |
| C1   | 27.5(13)        | 23.4(12)        | 25.4(12)        | -1.9(10)        | 2.9(10)         | 2.3(10)         |
| C23  | 25.3(14)        | 25.7(12)        | 28.4(13)        | -0.2(10)        | 1.6(11)         | -2.2(10)        |
| C24  | 29.0(15)        | 26.6(13)        | 38.0(14)        | 1.2(11)         | -1.2(12)        | 0.8(11)         |
| C25  | 43.1(18)        | 26.2(13)        | 45.0(17)        | 5.1(12)         | -5.5(15)        | -7.7(13)        |
| C26  | 41.0(18)        | 39.1(16)        | 42.2(16)        | 1.4(13)         | 4.0(15)         | -18.6(14)       |
| C27  | 33.0(18)        | 45.5(18)        | 51.7(19)        | -10.2(15)       | 11.8(15)        | -7.9(14)        |
| C28  | 30.6(15)        | 28.8(14)        | 47.1(17)        | -6.0(13)        | 6.6(14)         | -1.8(11)        |
| C13  | 23.7(14)        | 28.5(13)        | 35.3(14)        | -5.5(11)        | -2.2(12)        | 0.2(11)         |
| C16  | 35.4(17)        | 30.3(15)        | 48.0(18)        | -4.8(13)        | 2.6(14)         | 7.9(13)         |
| C8   | 32.4(16)        | 58.7(19)        | 31.0(14)        | 11.8(14)        | -1.8(13)        | -14.9(15)       |
| C9   | 74(3)           | 45(2)           | 59(2)           | 17.5(18)        | -2(2)           | -7.6(19)        |

**Table S5. Bond Lengths for dithiolopyridine 15a.**

| Atom | Atom | Length/Å   | Atom | Atom | Length/Å |
|------|------|------------|------|------|----------|
| S2   | S1   | 2.0716(10) | C6   | C2   | 1.508(4) |
| S2   | C3   | 1.753(3)   | C15  | C10  | 1.397(4) |
| S1   | C1   | 1.806(3)   | C15  | C14  | 1.385(4) |
| O1   | C7   | 1.234(4)   | C10  | C11  | 1.387(4) |
| O2   | C7   | 1.349(3)   | C14  | C13  | 1.390(4) |
| O2   | C8   | 1.447(4)   | C17  | C22  | 1.3900   |
| O3   | C13  | 1.374(4)   | C17  | C18  | 1.3900   |
| O3   | C16  | 1.431(4)   | C22  | C21  | 1.3900   |
| N2   | C4   | 1.395(4)   | C21  | C20  | 1.3900   |
| N2   | C3   | 1.393(4)   | C20  | C19  | 1.3900   |
| N2   | C23  | 1.428(3)   | C19  | C18  | 1.3900   |
| N3   | C4   | 1.354(4)   | C2   | C3   | 1.337(4) |
| N1   | C17  | 1.429(3)   | C2   | C1   | 1.444(4) |
| N1   | C1   | 1.269(4)   | C23  | C24  | 1.3900   |
| C5   | C7   | 1.435(4)   | C23  | C28  | 1.3900   |
| C5   | C6   | 1.530(4)   | C24  | C25  | 1.3900   |
| C5   | C4   | 1.379(4)   | C25  | C26  | 1.3900   |
| C12  | C11  | 1.381(4)   | C26  | C27  | 1.3900   |
| C12  | C13  | 1.390(4)   | C27  | C28  | 1.3900   |
| C6   | C10  | 1.530(4)   | C8   | C9   | 1.505(6) |

**Table S6. Bond Angles for dithiolopyridine 15a.**

| Atom | Atom | Atom | Angle/°   | Atom | Atom | Atom | Angle/°    |
|------|------|------|-----------|------|------|------|------------|
| C3   | S2   | S1   | 93.32(10) | C22  | C17  | C18  | 120.0      |
| C1   | S1   | S2   | 96.55(10) | C18  | C17  | N1   | 120.79(16) |
| C7   | O2   | C8   | 117.2(2)  | C17  | C22  | C21  | 120.0      |
| C13  | O3   | C16  | 116.9(2)  | C20  | C21  | C22  | 120.0      |
| C4   | N2   | C23  | 122.0(2)  | C19  | C20  | C21  | 120.0      |
| C3   | N2   | C4   | 118.7(2)  | C20  | C19  | C18  | 120.0      |
| C3   | N2   | C23  | 119.3(2)  | C19  | C18  | C17  | 120.0      |
| C1   | N1   | C17  | 119.4(2)  | C3   | C2   | C6   | 121.8(2)   |
| C7   | C5   | C6   | 119.0(2)  | C3   | C2   | C1   | 117.6(2)   |
| C4   | C5   | C7   | 119.2(3)  | C1   | C2   | C6   | 120.3(2)   |
| C4   | C5   | C6   | 121.7(2)  | N2   | C3   | S2   | 116.4(2)   |
| O1   | C7   | O2   | 121.1(3)  | C2   | C3   | S2   | 120.3(2)   |
| O1   | C7   | C5   | 126.8(3)  | C2   | C3   | N2   | 123.3(3)   |
| O2   | C7   | C5   | 112.1(2)  | N1   | C1   | S1   | 123.2(2)   |
| C11  | C12  | C13  | 120.1(3)  | N1   | C1   | C2   | 124.6(3)   |
| C10  | C6   | C5   | 112.6(2)  | C2   | C1   | S1   | 112.2(2)   |
| C2   | C6   | C5   | 109.5(2)  | C24  | C23  | N2   | 119.41(15) |
| C2   | C6   | C10  | 109.6(2)  | C24  | C23  | C28  | 120.0      |
| C14  | C15  | C10  | 121.8(3)  | C28  | C23  | N2   | 120.55(15) |
| C15  | C10  | C6   | 120.9(2)  | C25  | C24  | C23  | 120.0      |
| C11  | C10  | C6   | 121.4(2)  | C24  | C25  | C26  | 120.0      |
| C11  | C10  | C15  | 117.7(3)  | C27  | C26  | C25  | 120.0      |
| C12  | C11  | C10  | 121.3(3)  | C28  | C27  | C26  | 120.0      |
| N3   | C4   | N2   | 114.8(2)  | C27  | C28  | C23  | 120.0      |
| N3   | C4   | C5   | 124.3(3)  | O3   | C13  | C12  | 115.7(3)   |

|     |     |     |            |     |     |     |          |
|-----|-----|-----|------------|-----|-----|-----|----------|
| C5  | C4  | N2  | 120.9(2)   | O3  | C13 | C14 | 124.5(3) |
| C15 | C14 | C13 | 119.3(3)   | C14 | C13 | C12 | 119.7(3) |
| C22 | C17 | N1  | 119.14(15) | O2  | C8  | C9  | 111.7(3) |

**Table S7. Hydrogen Atom Coordinates ( $\text{\AA} \times 10^4$ ) and Isotropic Displacement Parameters ( $\text{\AA}^2 \times 10^3$ ) for 15a.**

| Atom | <i>x</i> | <i>y</i> | <i>z</i> | U(eq)  |
|------|----------|----------|----------|--------|
| H12  | 8522.98  | 4953.33  | 1147.15  | 38     |
| H6   | 4781.51  | 6264.39  | 2060.36  | 29     |
| H15  | 4972.41  | 3502.85  | 2261.31  | 34     |
| H11  | 6768.89  | 5973.58  | 1448.02  | 33     |
| H14  | 6741.22  | 2474.85  | 1984.7   | 37     |
| H22  | 6428.02  | 8015.48  | 3914.72  | 42     |
| H21  | 7820.34  | 8445.03  | 4822.78  | 54     |
| H20  | 9075.12  | 7171.93  | 5351.19  | 58     |
| H19  | 8937.59  | 5469.26  | 4971.54  | 57     |
| H18  | 7545.29  | 5039.69  | 4063.48  | 47     |
| H24  | 2272.41  | 2388.49  | 2553.3   | 37     |
| H25  | 723.58   | 1217.61  | 2950.3   | 46     |
| H26  | -1227.11 | 1812.44  | 3416.31  | 49     |
| H27  | -1628.98 | 3578.16  | 3485.33  | 52     |
| H28  | -80.17   | 4749.07  | 3088.33  | 43     |
| H16A | 8167.38  | 1747.53  | 1082.28  | 57     |
| H16B | 8702.09  | 1745.04  | 1847.12  | 57     |
| H16C | 9674.91  | 1689.71  | 1218.03  | 57     |
| H8A  | 4207.88  | 6297.59  | -210.12  | 49     |
| H8B  | 5362.96  | 6999.27  | 45.69    | 49     |
| H9A  | 3730.66  | 8048.21  | -394.16  | 89     |
| H9B  | 3843.09  | 8252.35  | 408.27   | 89     |
| H9C  | 2711.45  | 7557.99  | 117.98   | 89     |
| H3A  | 1290(30) | 4710(30) | 1070(20) | 26(8)  |
| H3B  | 530(40)  | 4120(30) | 1610(20) | 47(11) |

Figure S6-1 IR spectrum of dimethoxy compound 10a

Chemical structure of compound 10a (dimethoxy compound) is shown as an inset. The structure features a benzothiazine core substituted with a nitro group (NO<sub>2</sub>), a methoxy group (CH<sub>3</sub>O), and a phenyl ring.

Key IR peaks (Wavenumber in cm<sup>-1</sup>):

- 3444.71
- 3263.41
- 2974.1
- 2862.23
- 1660.64
- 1602.77
- 1523.7
- 1483.19
- 1454.26
- 1390.61
- 1346.25
- 1299.96
- 1236.32
- 1207.38
- 1197.74
- 1103.23
- 1085.87
- 1047.3
- 1024.16
- 1002.94
- 950.86
- 840.93
- 783.06
- 765.71
- 736.77
- 696.27
- 657.7
- 578.62
- 511.11
- 451.32

Chemical structure of compound 1 is shown above the spectrum. The structure is a benzimidazole derivative with a nitro group, a benzyl group, and a benzylidene group. The spectrum is divided into two regions: 6.5-7.5 ppm and 3.8-4.1 ppm. The 6.5-7.5 ppm region shows aromatic and heterocyclic protons with integrations of 1.26, 3.49, 1.13, and 1.99. The 3.8-4.1 ppm region shows a multiplet with an integration of 1.99. The chemical structure is labeled with 'H<sub>2</sub>N' and 'O' atoms. The solvent peaks for DMSO-d<sub>6</sub> (2.490 ppm) and acetone (2.073 ppm) are also present.



Figure S12.  $^1\text{H}$  NMR spectrum of dithiopyridine 15c, DMSO- $d_6$  (400 MHz)

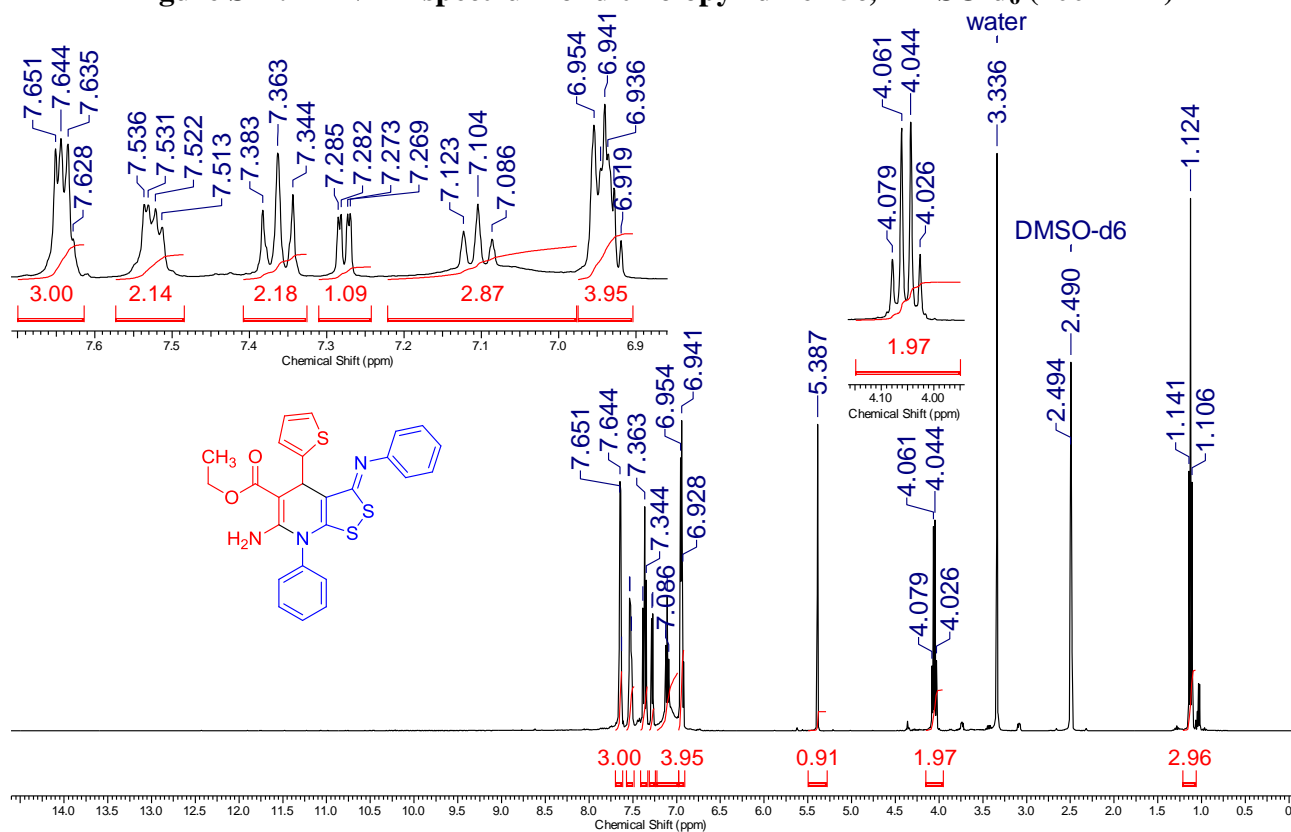

Figure S13.  $^{13}\text{C}$  DEPTQ NMR spectrum of dithiopyridine 15c, DMSO- $d_6$  (101 MHz)

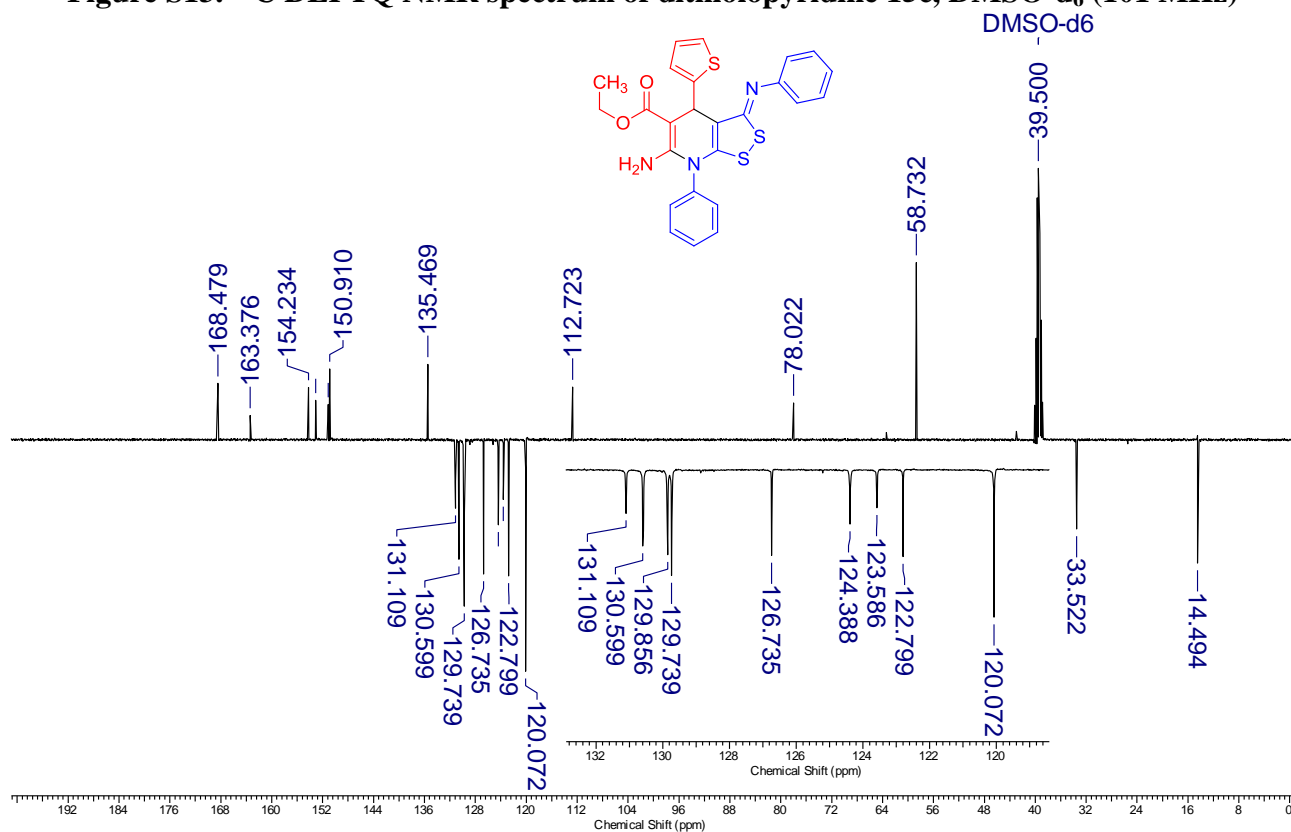

**Figure S14.**  $^1\text{H}$ - $^{13}\text{C}$  HSQC NMR spectrum of the dithiopyridine 15c, DMSO- $\text{d}_6$  (400/101 MHz)

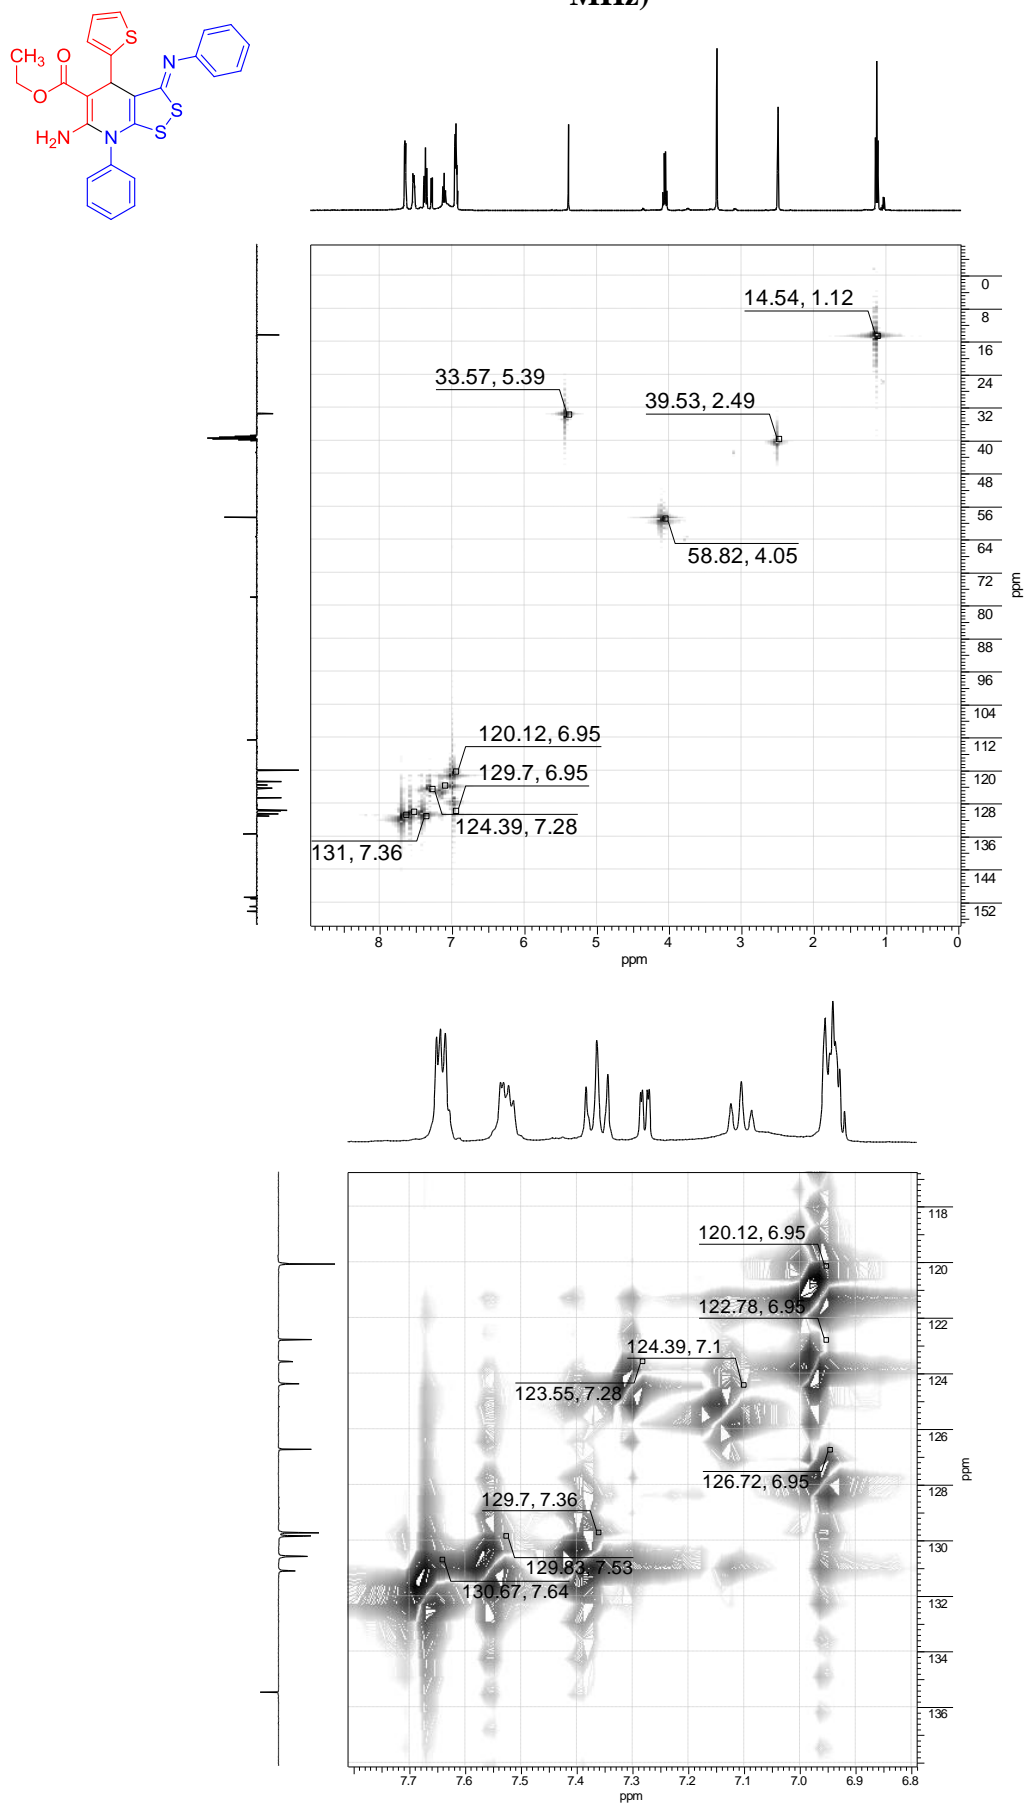



**Figure S15.**  $^1\text{H}$ - $^{13}\text{C}$  HMBC NMR spectrum of the dithiopyridine 15c, DMSO- $d_6$  (400/101 MHz)

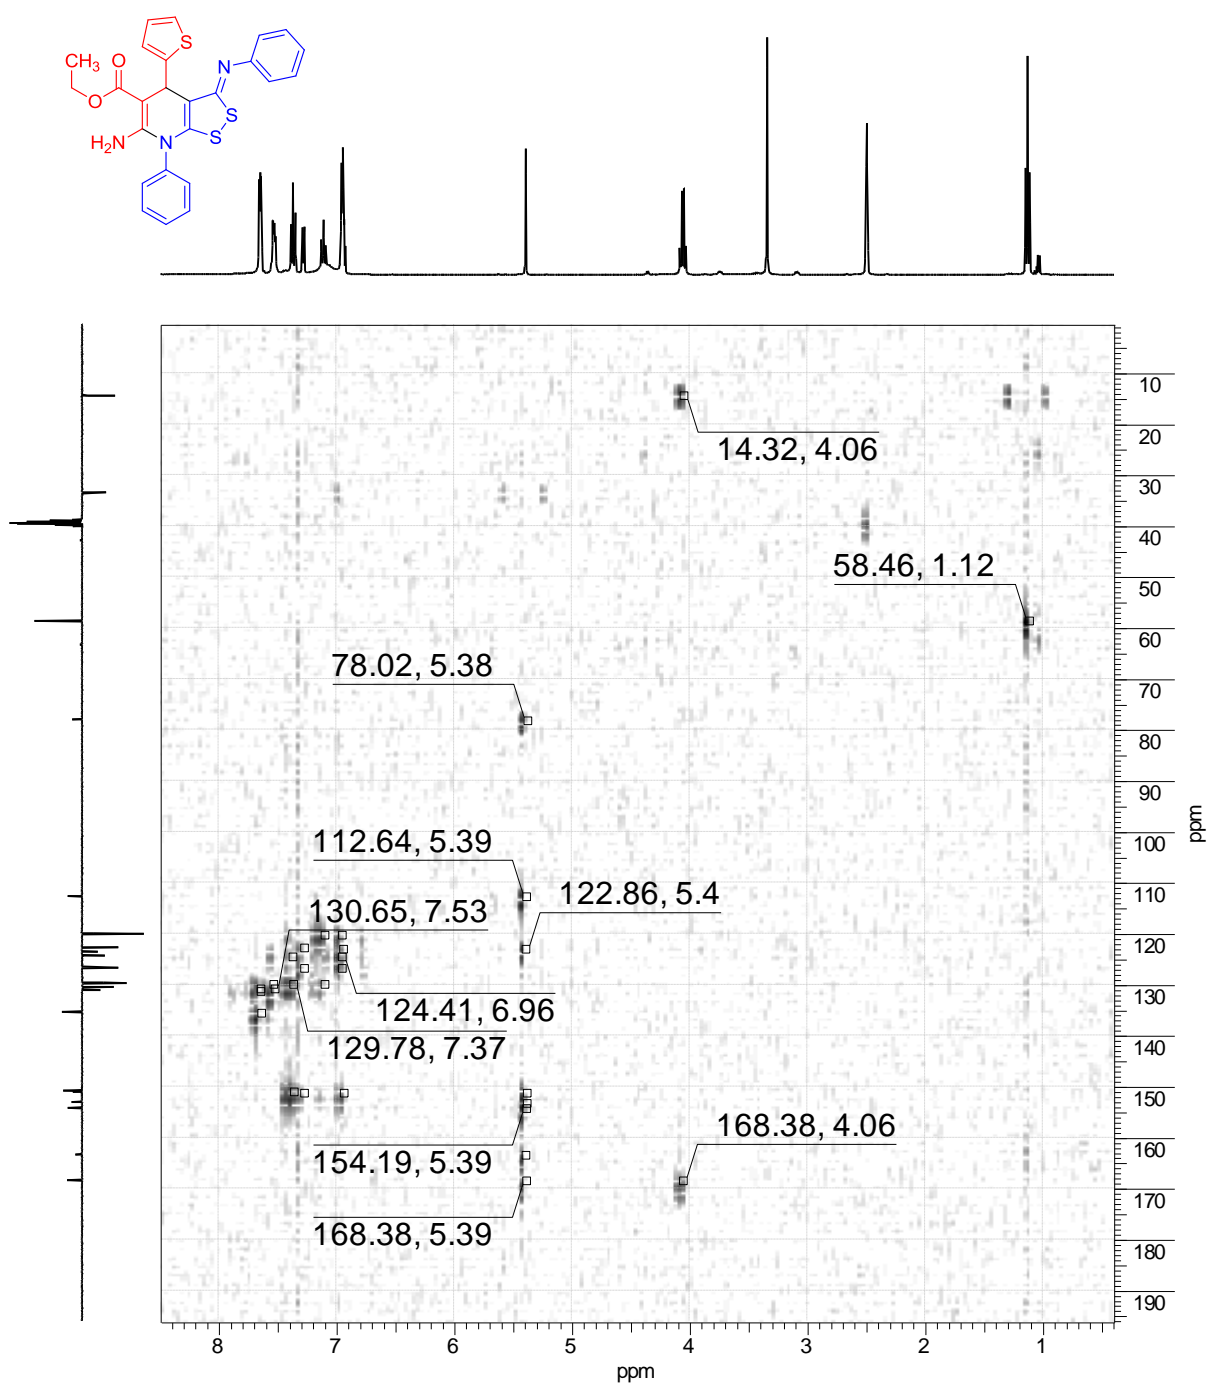

**Figure S16.**  $^1\text{H}$ - $^{13}\text{C}$  HMBC NMR spectrum of the dithiopyridine 15c, DMSO- $d_6$  (400/101 MHz) (fragment)

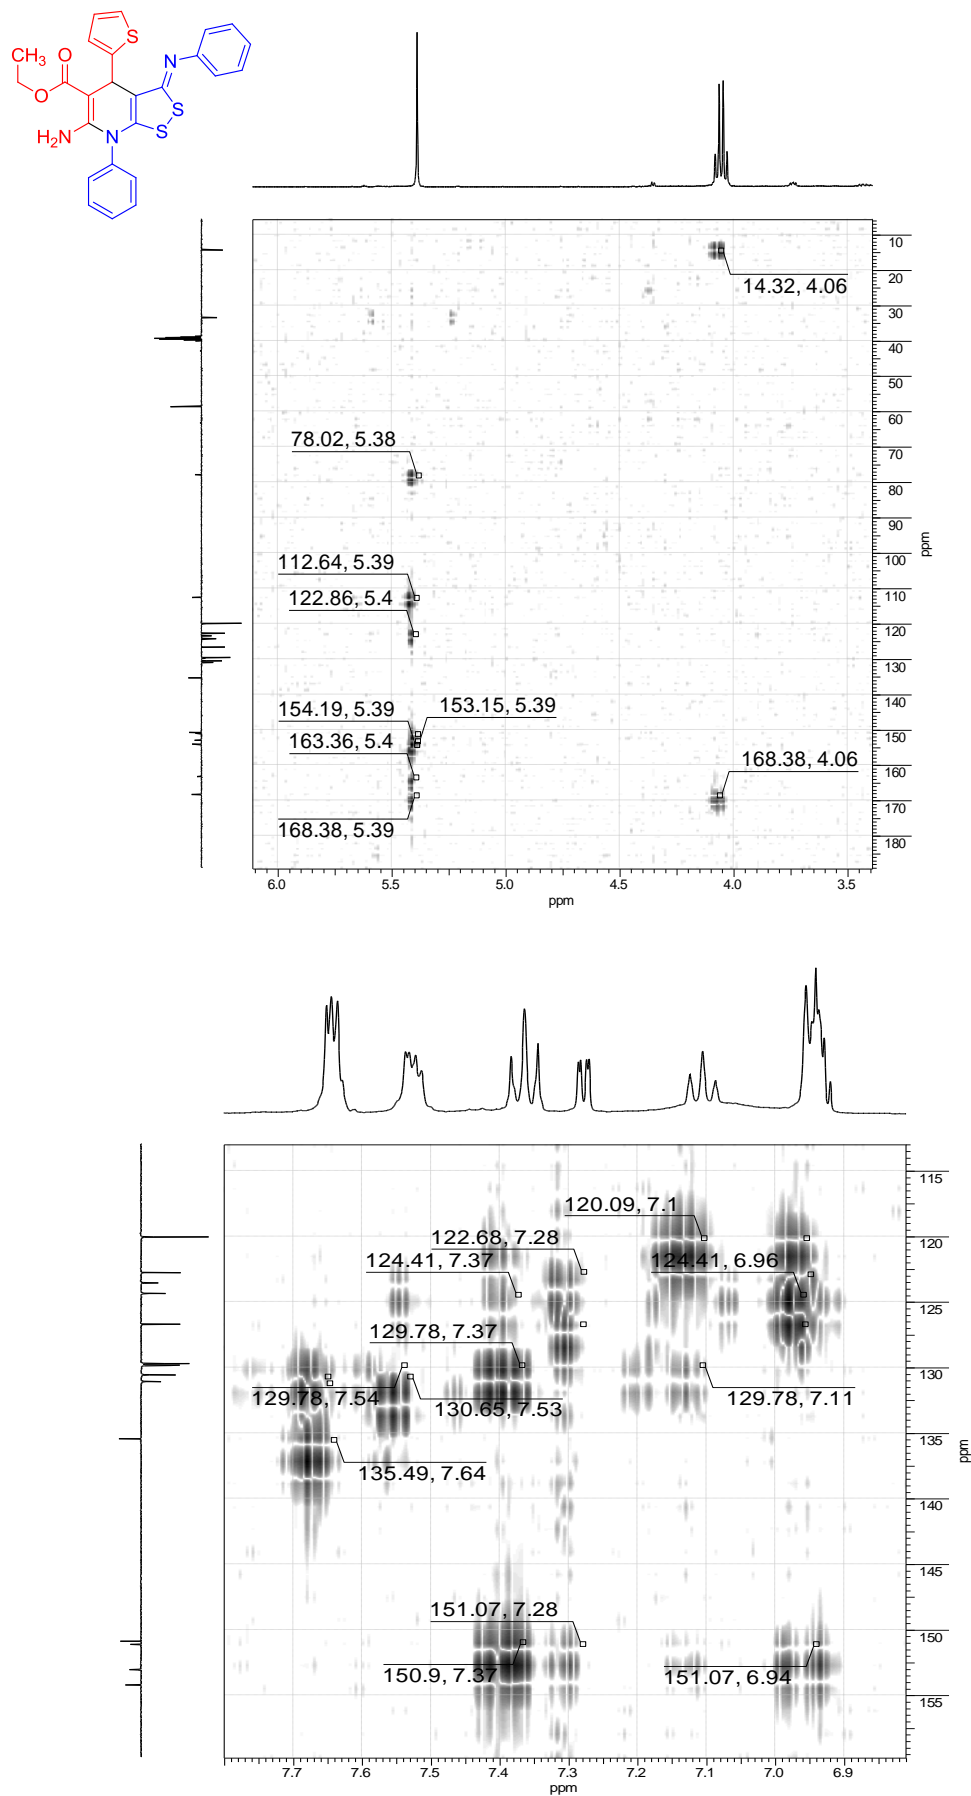

**Table S8. The observed correlations in the  $^1\text{H}$ - $^{13}\text{C}$  HSQC and  $^1\text{H}$ - $^{13}\text{C}$  HMBC 2D NMR spectra of dithiolopyridine 15c**

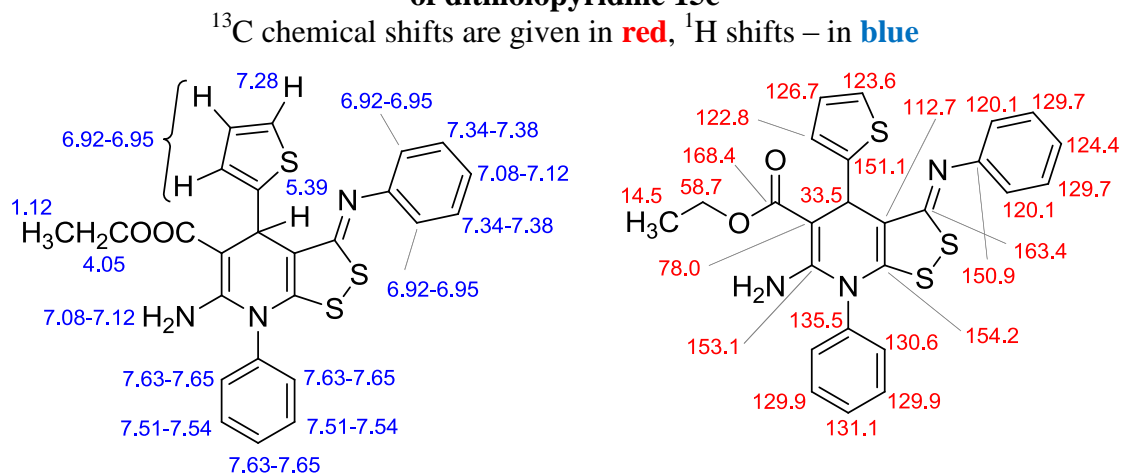

| $^1\text{H}$ NMR shifts, $\delta$ , ppm                      | Correlations in HSQC spectrum, $\delta$ , ppm                       | Correlations in HMBC spectrum, $\delta$ , ppm                                                                            |
|--------------------------------------------------------------|---------------------------------------------------------------------|--------------------------------------------------------------------------------------------------------------------------|
| 1.12 (t, $^3J = 7.1$ Hz, 3H, $\text{CH}_3\text{CH}_2$ )      | 14.5* (CH <sub>3</sub> )                                            | 58.7 (OCH <sub>2</sub> )                                                                                                 |
| 4.05 (q, $^3J = 7.1$ Hz, 2H, $\text{CH}_3\text{CH}_2$ )      | 58.7 (OCH <sub>2</sub> )                                            | 14.5* (CH <sub>3</sub> ), 168.5 (C=O)                                                                                    |
| 5.39 (s, 1H, H-4)                                            | 33.5* (C-4)                                                         | 78.0 (C-5), 112.7 (C-3a), 122.8* (C-2 thienyl), 151.1 (C-1 thienyl), 153.1 (C-6), 154.2 (C-8a), 163.4 (C=N), 168.5 (C=O) |
| 6.92-6.95 (m, 4H, H-3 H-4 thienyl and H-2 H-6 Ph overlapped) | 120.1* (2C, C-2 C-6 Ph), 122.8* (C-2 thienyl), 126.7* (C-4 thienyl) | 120.1* (2C, C-2 C-6 Ph), 122.8* (C-2 thienyl), 124.4* (C-4 Ar), 126.7* (C-4 thienyl), 151.1 (C-1 thienyl)                |
| 7.09-7.12 (m, 3H, H-4 Ph and $\text{NH}_2$ overlapped)       | 124.4* (C-4 Ar)                                                     | 120.1* (2C, C-2 C-6 Ph), 129.7* (2C, C-3 C-5 Ph)                                                                         |
| 7.28 (dd, $^3J = 4.9$ Hz, $^4J = 1.5$ Hz, 1H, H-5 2-thienyl) | 123.6* (C-5 thienyl)                                                | 122.8* (C-2 thienyl), 126.7* (C-4 thienyl), 151.1 (C-1 thienyl)                                                          |
| 7.34-7.38 (m, 2H, H-3 H-5 Ph)                                | 129.7* (2C, C-3 C-5 Ph)                                             | 124.4* (C-4 Ar), 129.7* (2C, C-3 C-5 Ph), 150.9 (C-1 Ph)                                                                 |
| 7.51-7.54 (m, 2H, H-3 H-5 Ph)                                | 129.9* (2C, C-3 C-5 Ph)                                             | 129.9* (2C, C-3 C-5 Ph), 130.6* (2C, C-2 C-6 Ph)                                                                         |
| 7.63-7.65 (m, 3H, H-2 H-6 H-4 Ph)                            | 130.6* (2C, C-2 C-6 Ph), 131.1* (C-4 Ph)                            | 130.6* (2C, C-2 C-6 Ph), 131.1* (C-4 Ph), 135.5 (C-1 Ph)                                                                 |

\*Signals with a negative phase.

Chemical structure of compound 10 is shown in the bottom right corner of the IR spectrum plot.

Key IR peaks (Wavenumber in  $\text{cm}^{-1}$ ):

- 3371.42
- 3271.13
- 2976.03
- 2360.76 ( $\text{CO}_2$ )
- 1654.85
- 1577.7
- 1511.83
- 1479.34
- 1450.4
- 1367.47
- 1296.11
- 1205.46
- 1085.87
- 1022.23
- 1010.65
- 921.93
- 910.36
- 842.85
- 794.64
- 765.71
- 719.42
- 692.41
- 648.05
- 582.48
- 514.97
- 482.18
- 445.54

Figure 1 displays the  $^1\text{H}$  NMR spectra of compound **1**. The chemical structure of **1** is shown above the spectra. The top spectrum is the  $^1\text{H}$  NMR in  $\text{DMSO}-d_6$ , and the bottom spectrum is the  $^1\text{H}$  NMR in  $\text{CDCl}_3$ . The chemical shifts (ppm) and integration values are provided for each peak.

**Chemical Structure of Compound 1:**

COc1ccc(cc1)-c2nc3ccccc3n2-c4ccccc4-c5ccc(cc5)N

**$^1\text{H}$  NMR in  $\text{DMSO}-d_6$  (Top Spectrum):**

- 7.421, 7.400, 7.349, 7.328, 7.321, 7.301 (aromatic protons, integration 2.49, 4.03)
- 7.090, 7.072, 7.053 (aromatic protons, integration 3.01)
- 6.844, 6.825 (aromatic protons, integration 2.08)
- 3.966, 3.949, 3.932, 3.982 (methoxy protons, integration 2.04)
- 3.321 (water)
- 2.490 ( $\text{DMSO}-d_6$ )
- 1.084, 1.066, 1.049 (methyl protons, integration 3.15)

**$^1\text{H}$  NMR in  $\text{CDCl}_3$  (Bottom Spectrum):**

- 7.672, 7.654, 7.421, 7.400, 7.349, 7.328, 7.321, 6.844 (aromatic protons, integration 5.09, 3.01)
- 5.040 (aromatic proton, integration 1.00)
- 3.982, 3.966, 3.949, 3.932 (methoxy protons, integration 2.04)
- 1.084, 1.066, 1.049 (methyl protons, integration 3.15)

Figure S19.  $^{13}\text{C}$  DEPTQ NMR spectrum of dithiopyridine 15d, DMSO- $\text{d}_6$  (101 MHz)

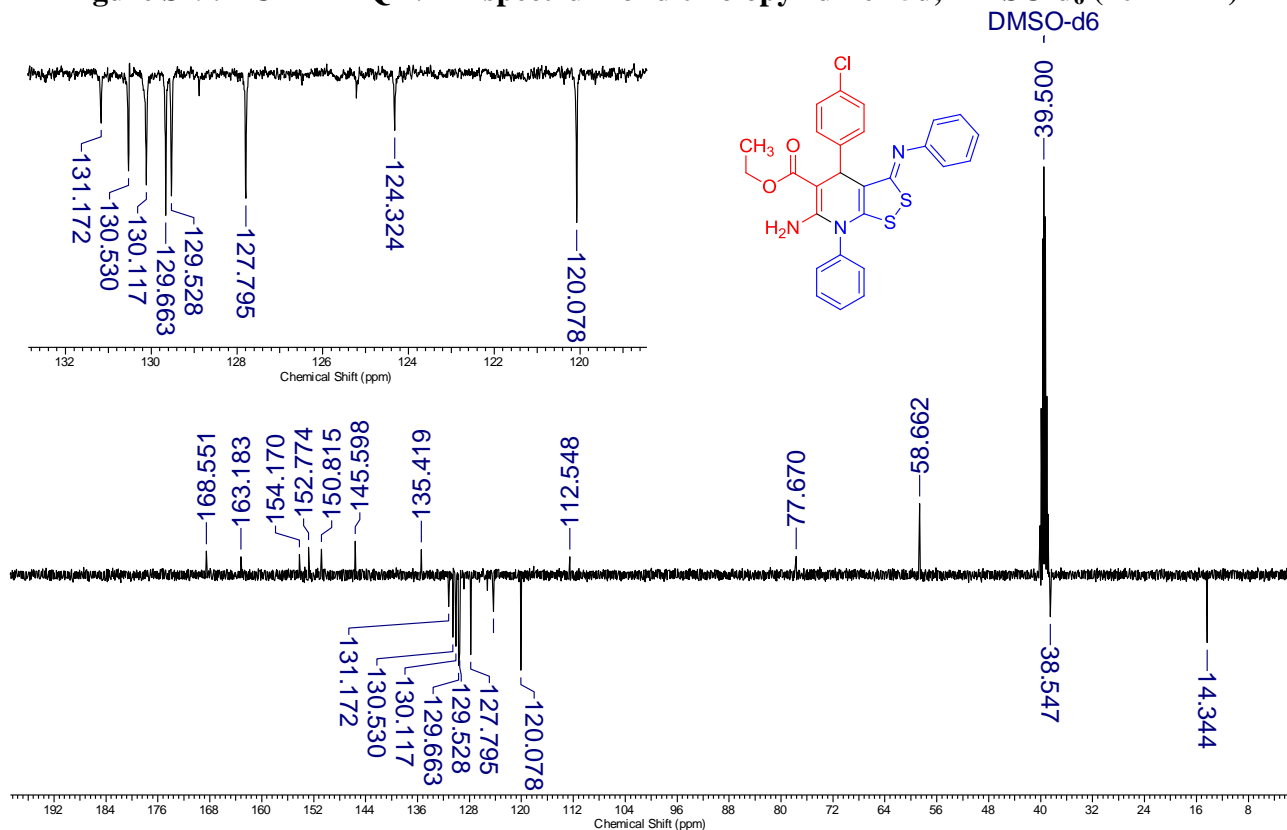

Figure S20. FTIR spectrum of dithiopyridine 15f

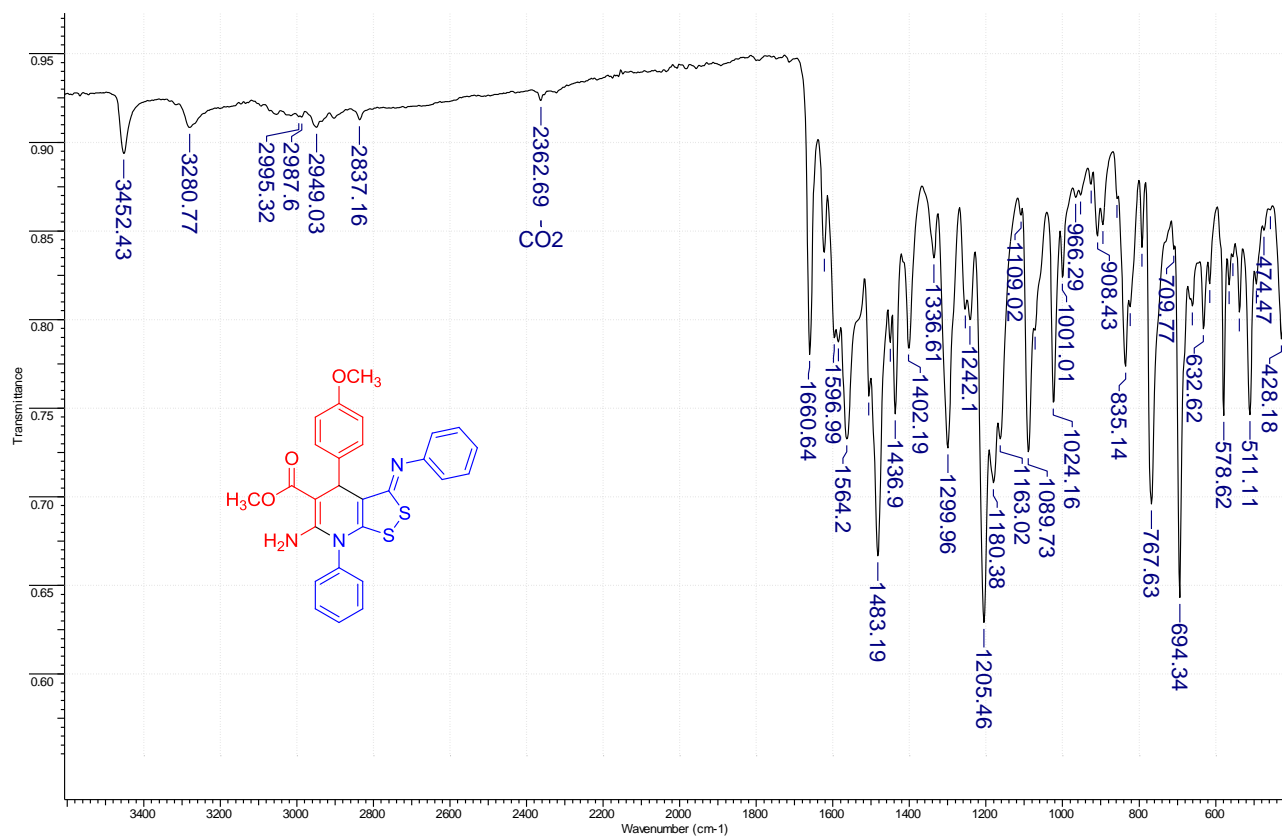

**Figure S21.**  $^1\text{H}$  NMR spectrum of dithiolopyridine 15f, DMSO- $\text{d}_6$  (400 MHz)

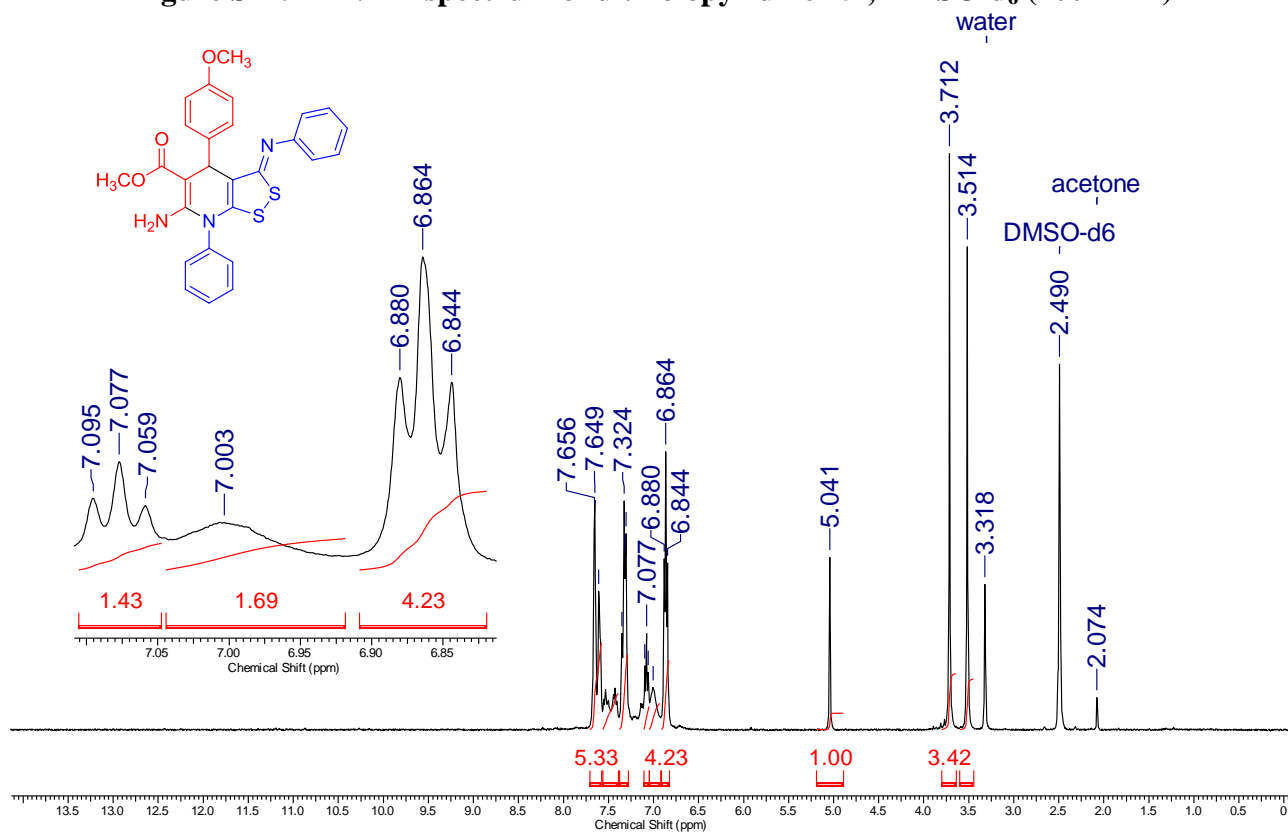

**Figure S22.**  $^{13}\text{C}$  DEPTQ NMR spectrum of dithiolopyridine 15f, DMSO- $\text{d}_6$  (101 MHz)

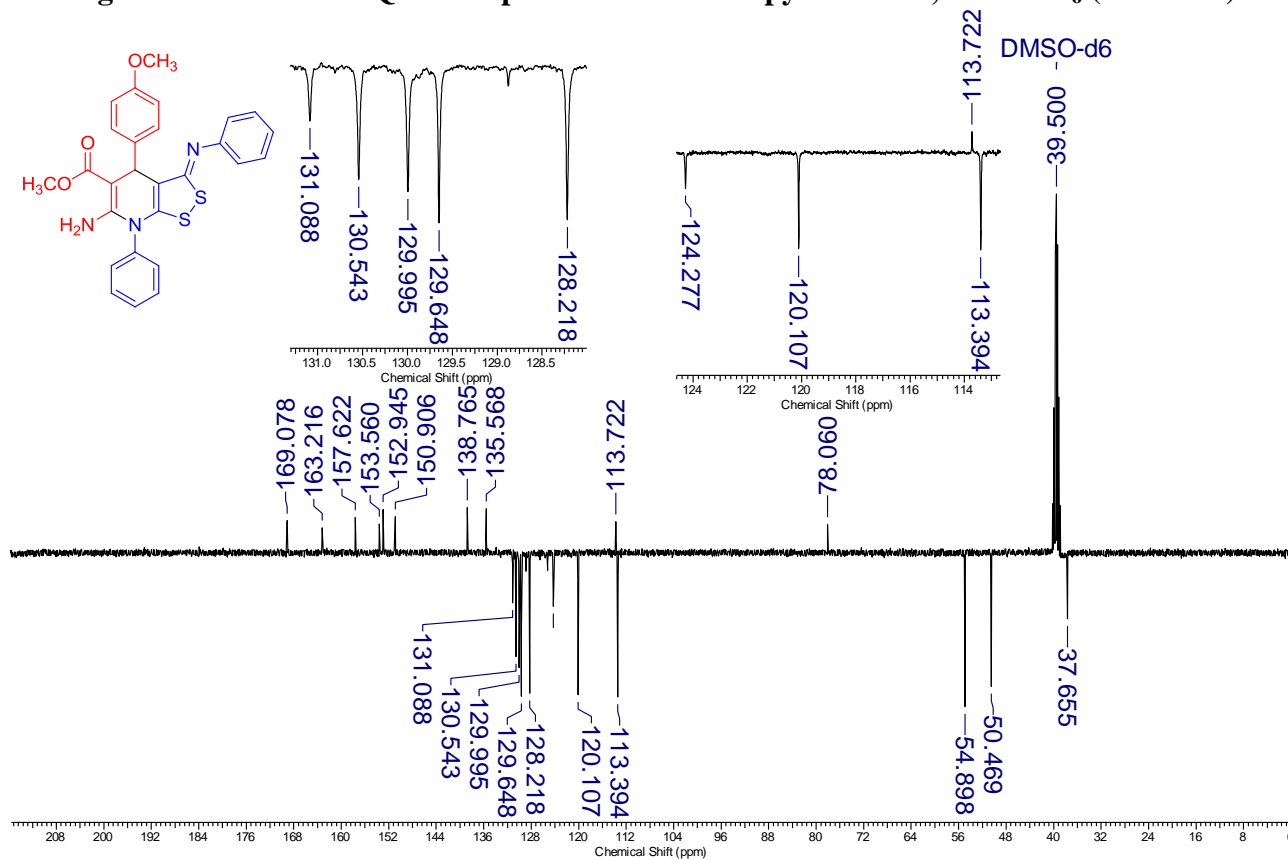

**Figure S23.**  $^1\text{H}$ - $^{13}\text{C}$  HSQC NMR spectrum of the dithiopyridine 15f, DMSO- $\text{d}_6$  (400/101 MHz)

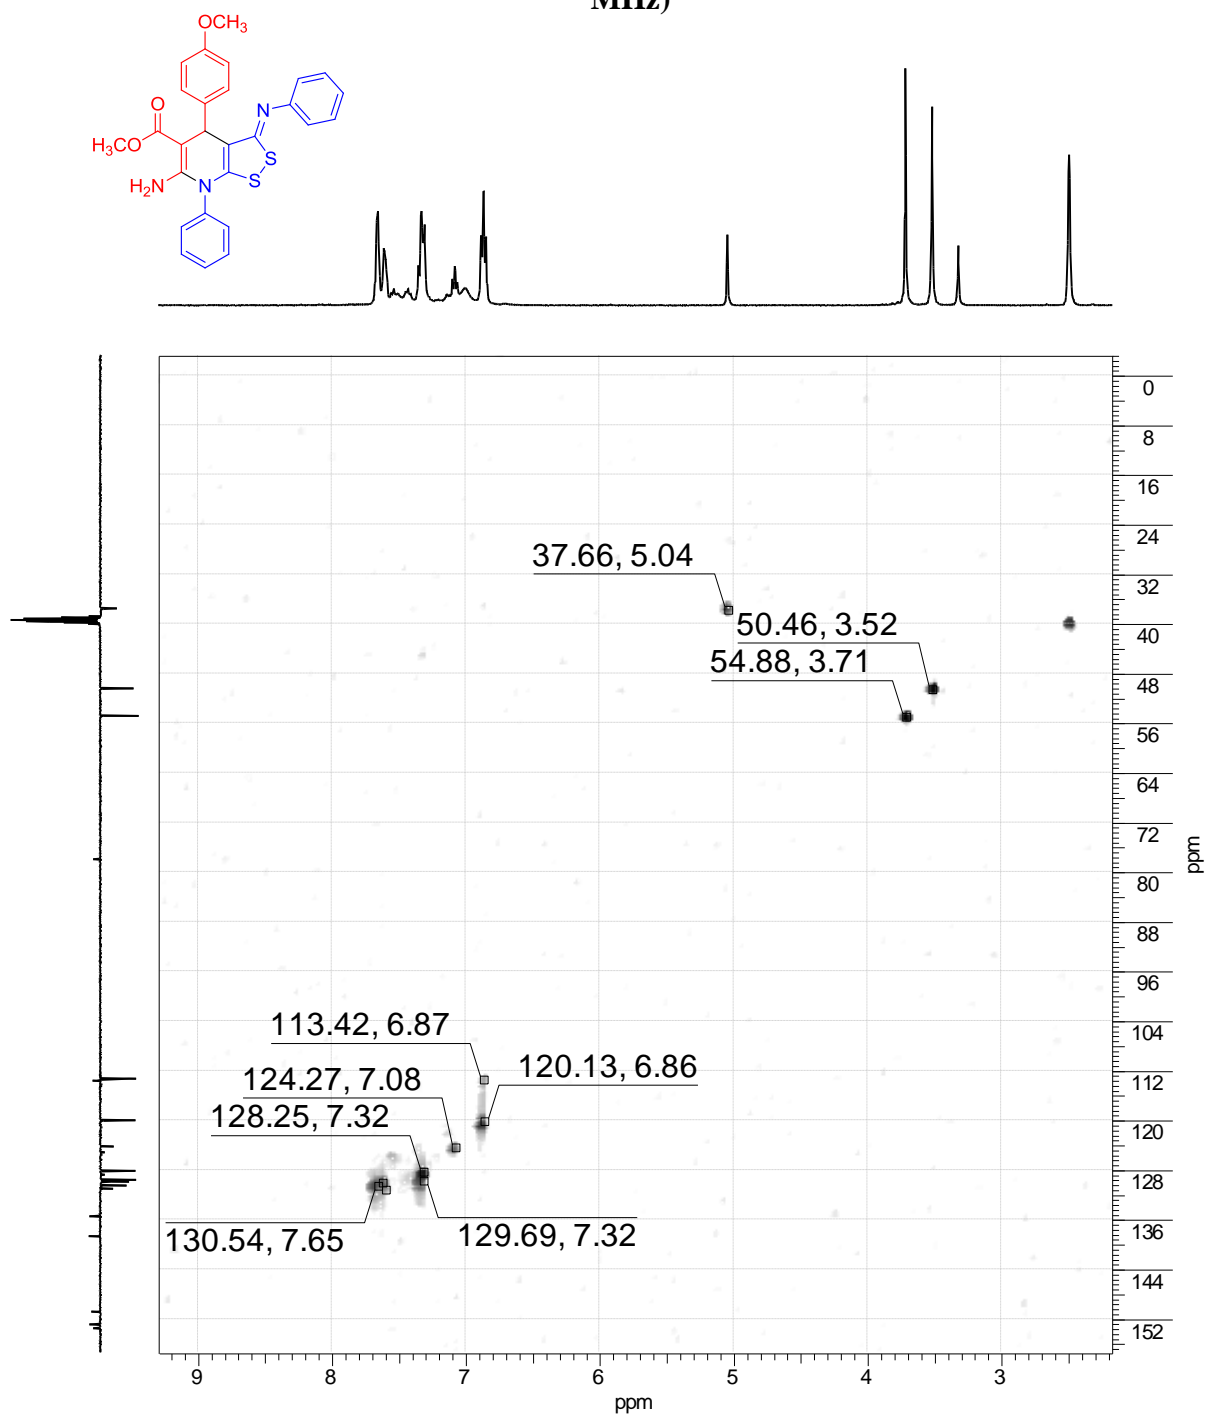

**Figure S24.**  $^1\text{H}$ - $^{13}\text{C}$  HMBC NMR spectrum of the dithiopyridine **15f**, DMSO- $\text{d}_6$  (400/101 MHz)

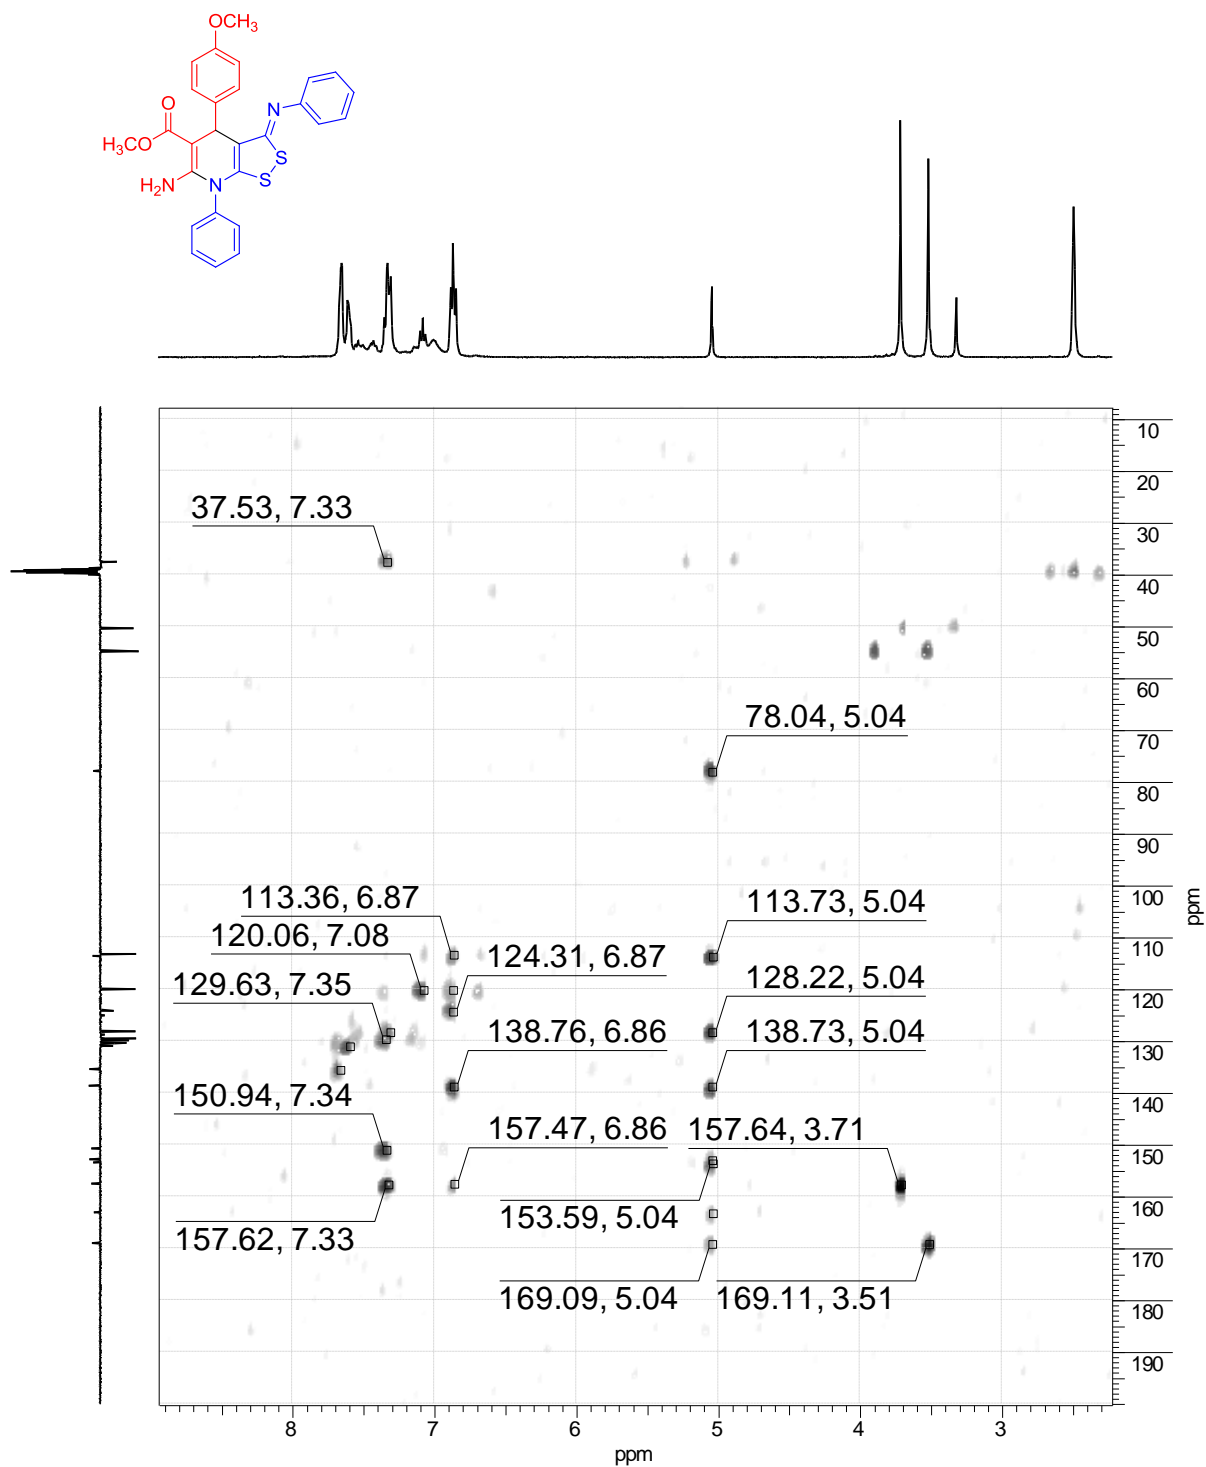



Figure S25.  $^1\text{H}$ - $^{13}\text{C}$  HMBC NMR spectrum of the dithiopyridine 15f, DMSO- $\text{d}_6$  (400/101 MHz) (fragment)

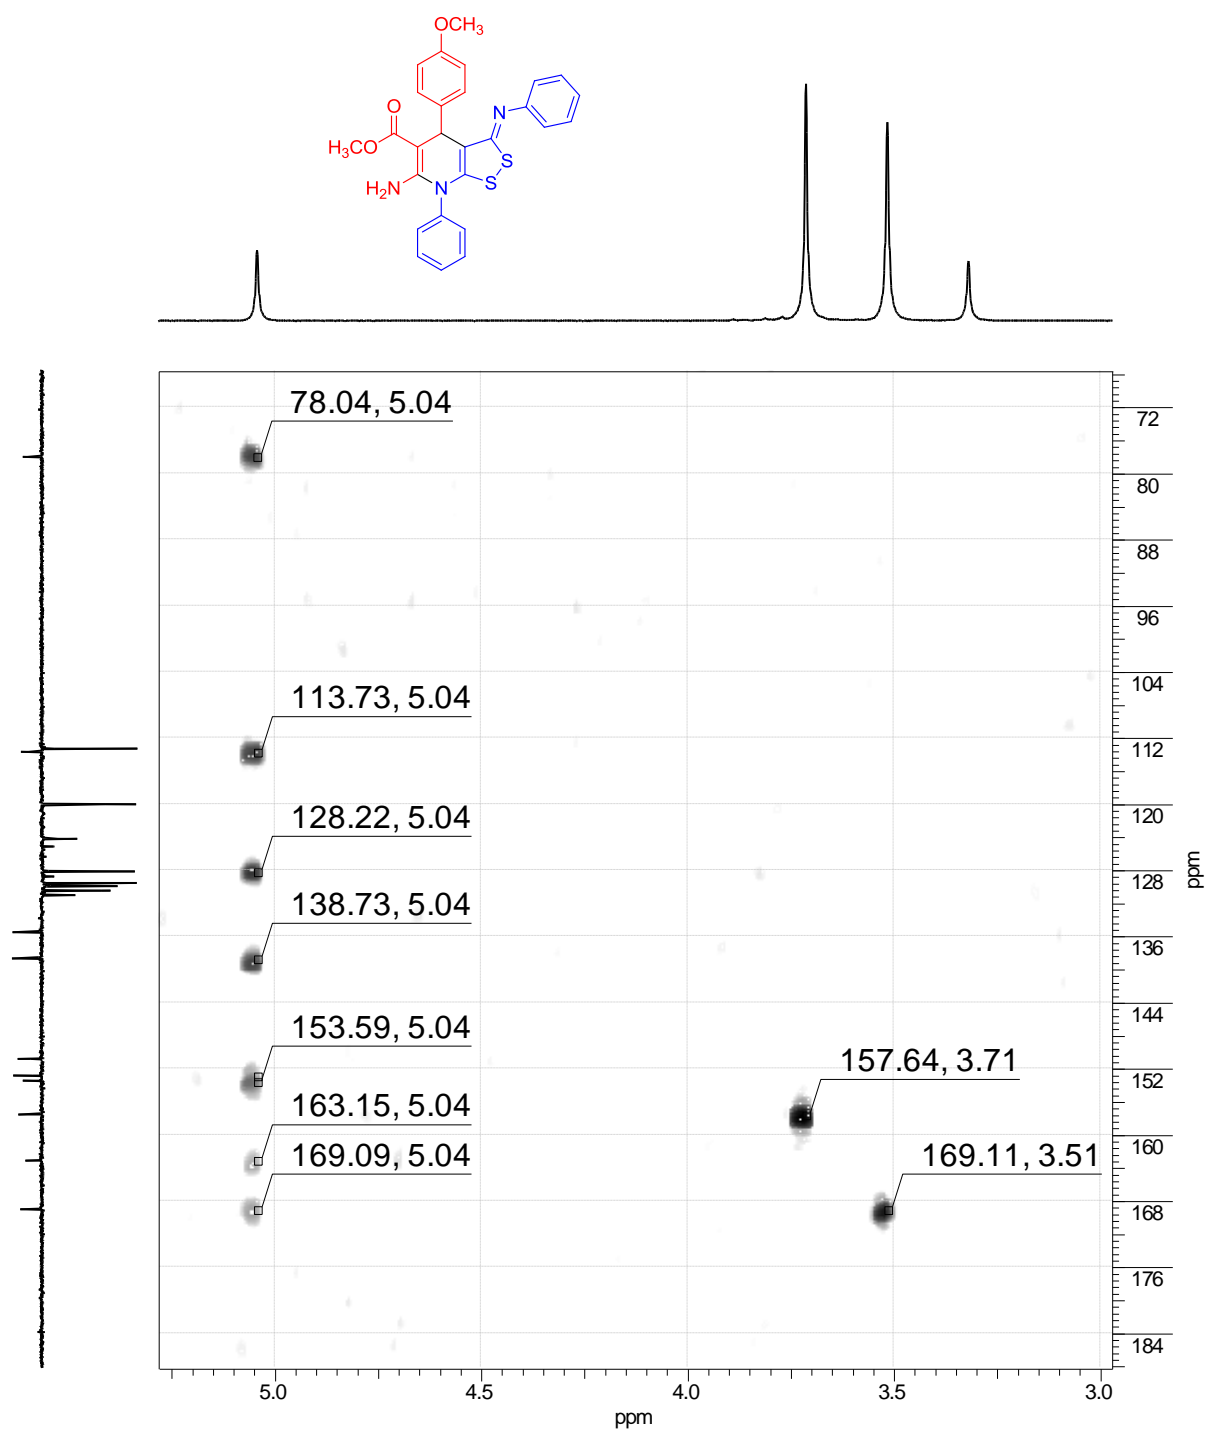

**Table S9. The observed correlations in the  $^1\text{H}$ - $^{13}\text{C}$  HSQC and  $^1\text{H}$ - $^{13}\text{C}$  HMBC 2D NMR spectra of dithiolopyridine 15f**

$^{13}\text{C}$  chemical shifts are given in **red**,  $^1\text{H}$  shifts – in **blue**

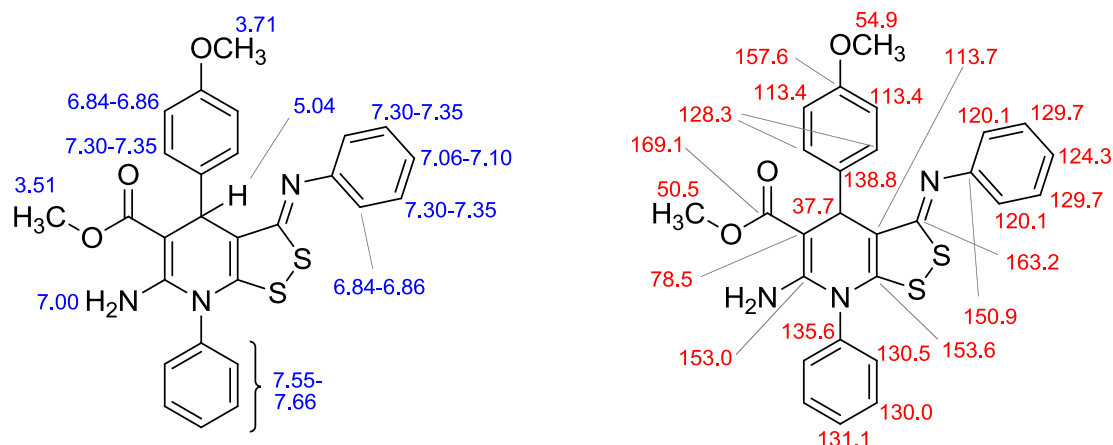

| $^1\text{H}$ NMR shifts, $\delta$ , ppm | Correlations in HSQC spectrum, $\delta$ , ppm     | Correlations in HMBC spectrum, $\delta$ , ppm                                                                     |
|-----------------------------------------|---------------------------------------------------|-------------------------------------------------------------------------------------------------------------------|
| 3.51 (s, 3H, COOMe)                     | 50.5* (CO <sub>2</sub> CH <sub>3</sub> )          | 169.1 (C=O)                                                                                                       |
| 3.71 (s, 3H, MeO-Ar)                    | 54.9* (OCH <sub>3</sub> )                         | 157.6 (C-OMe)                                                                                                     |
| 5.04 (s, 1H, H-4)                       | 37.7* (C-4)                                       | 78.1 (C-5), 113.7 (C-3a), 128.3* (2C, CH Ar), 138.8 (C-1 Ar), 153.0 (C-6), 153.6 (C-8a), 163.2 (C=N), 169.1 (C=O) |
| 6.84–6.88 (m, 4H, H Ar)                 | 113.4* (2C, CH Ar)<br>120.1* (2C, CH Ar)          | 113.4* (2C, CH Ar), 120.1* (2C, CH Ar), 124.3* (CH Ar), 138.8 (C-1 Ar), 157.6 (C-OMe)                             |
| 7.00 (very br s, 2H, NH <sub>2</sub> )  | —                                                 | —                                                                                                                 |
| 7.06–7.10 (m, 1H, H-4 Ph)               | 124.3* (CH Ar)                                    | 120.1* (2C, CH Ar)                                                                                                |
| 7.30–7.35 (m, 4H, H Ar)                 | 128.3* (2C, CH Ar),<br>129.7* (2C, CH Ar)         | 37.7* (C-4), 128.3* (2C, CH Ar), 129.7* (2C, CH Ar), 150.9 (C-1 Ph), 157.6 (C-OMe)                                |
| 7.55–7.66 (m, 5H, H Ar)                 | 130.0* (CH Ar), 130.5* (CH Ar),<br>131.1* (CH Ar) | 130.0* (CH Ar), 130.5* (CH Ar), 131.1* (CH Ar), 135.6 (C-1 Ph)                                                    |

\*Signals with a negative phase.

**Figure S26. HRMS spectrum of dithiopyridine 15a**

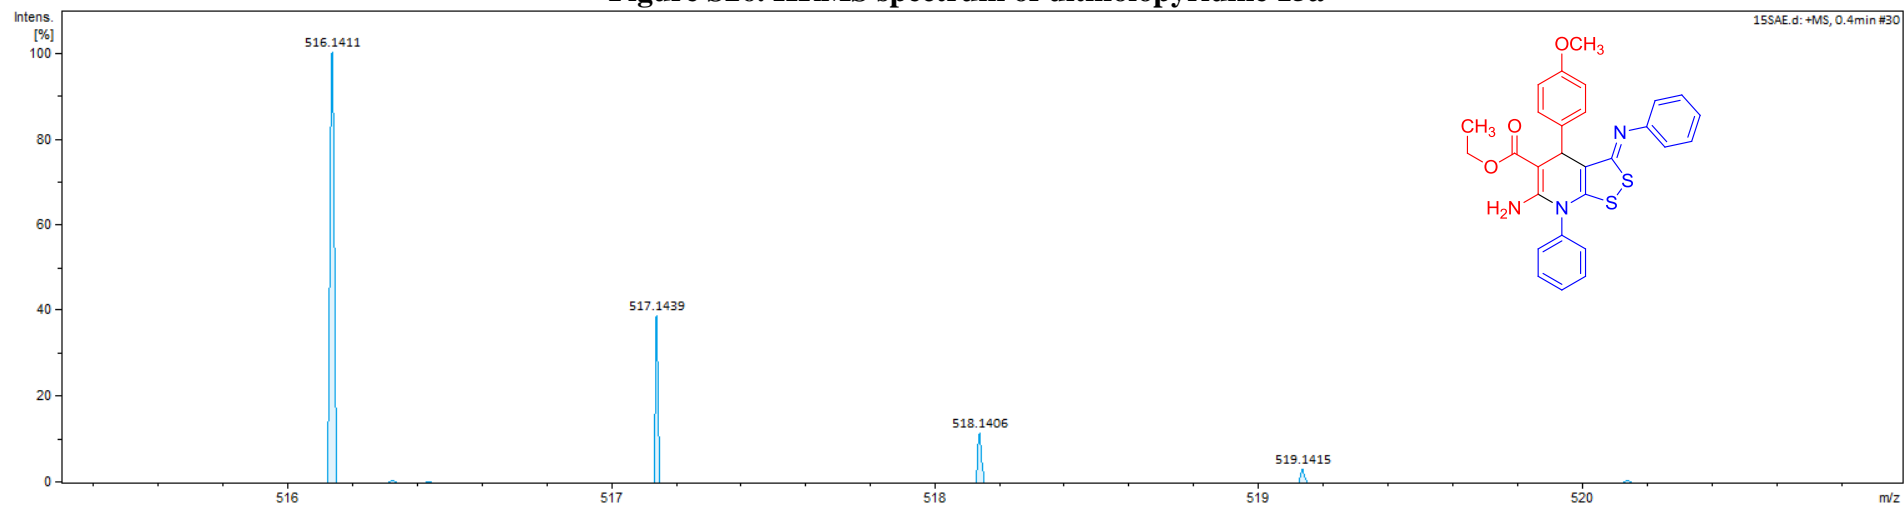

**Figure S27. HRMS spectrum of dithiopyridine 15b**

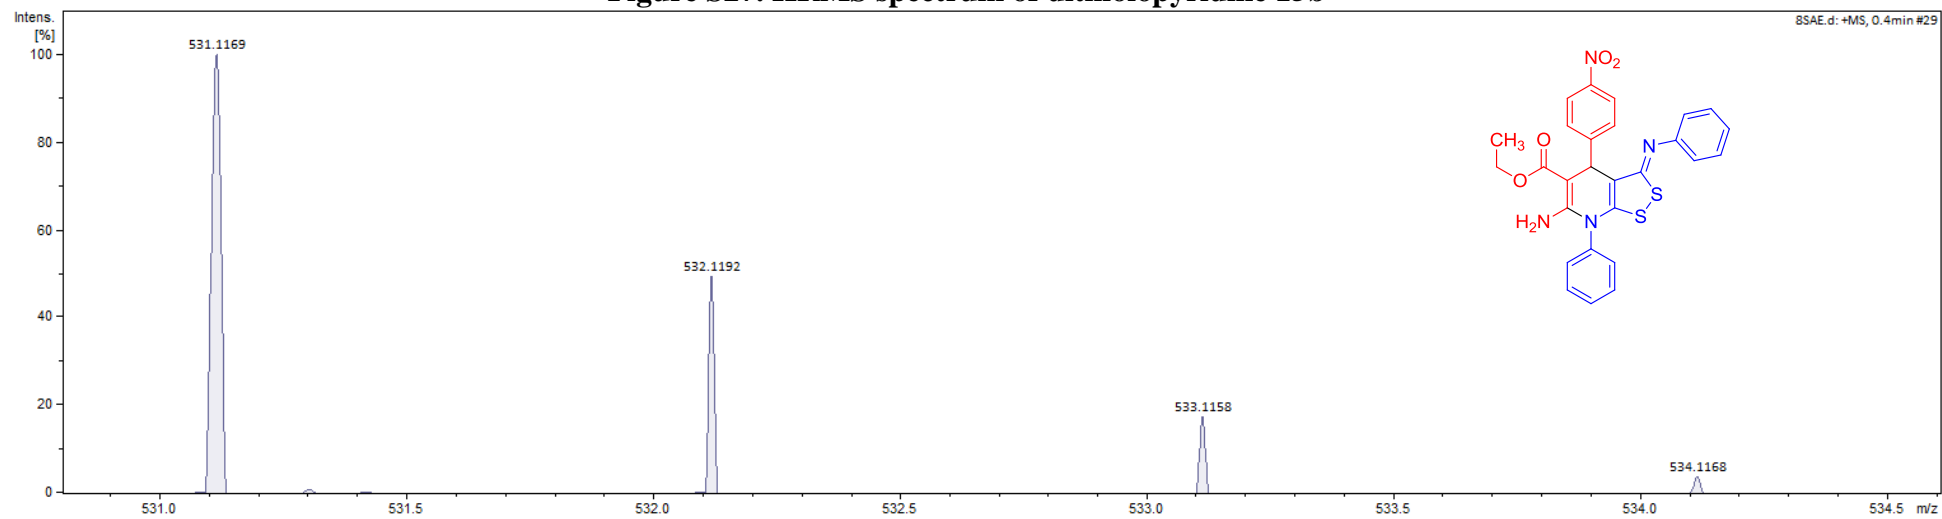

**Figure S28. HRMS spectrum of dithiopyridine 15c**

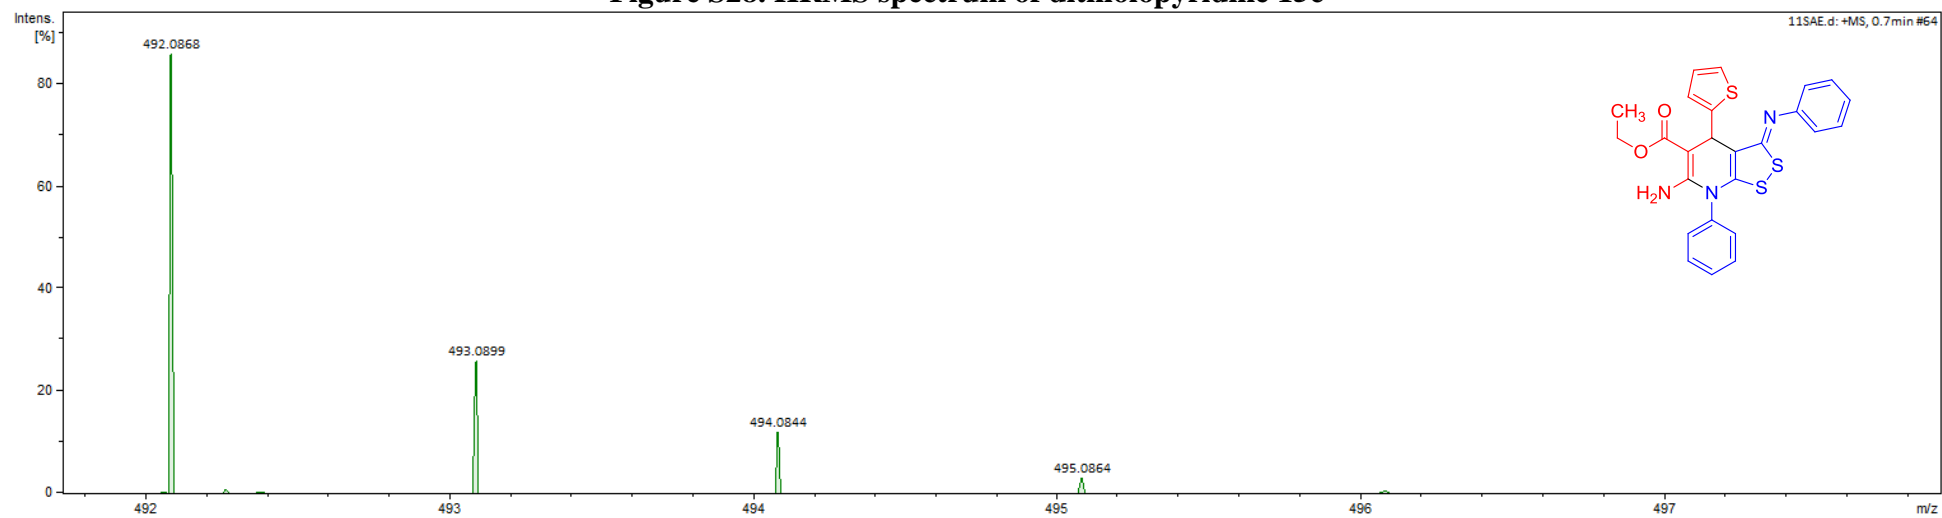

**Figure S29. HRMS spectrum of dithiopyridine 15d**

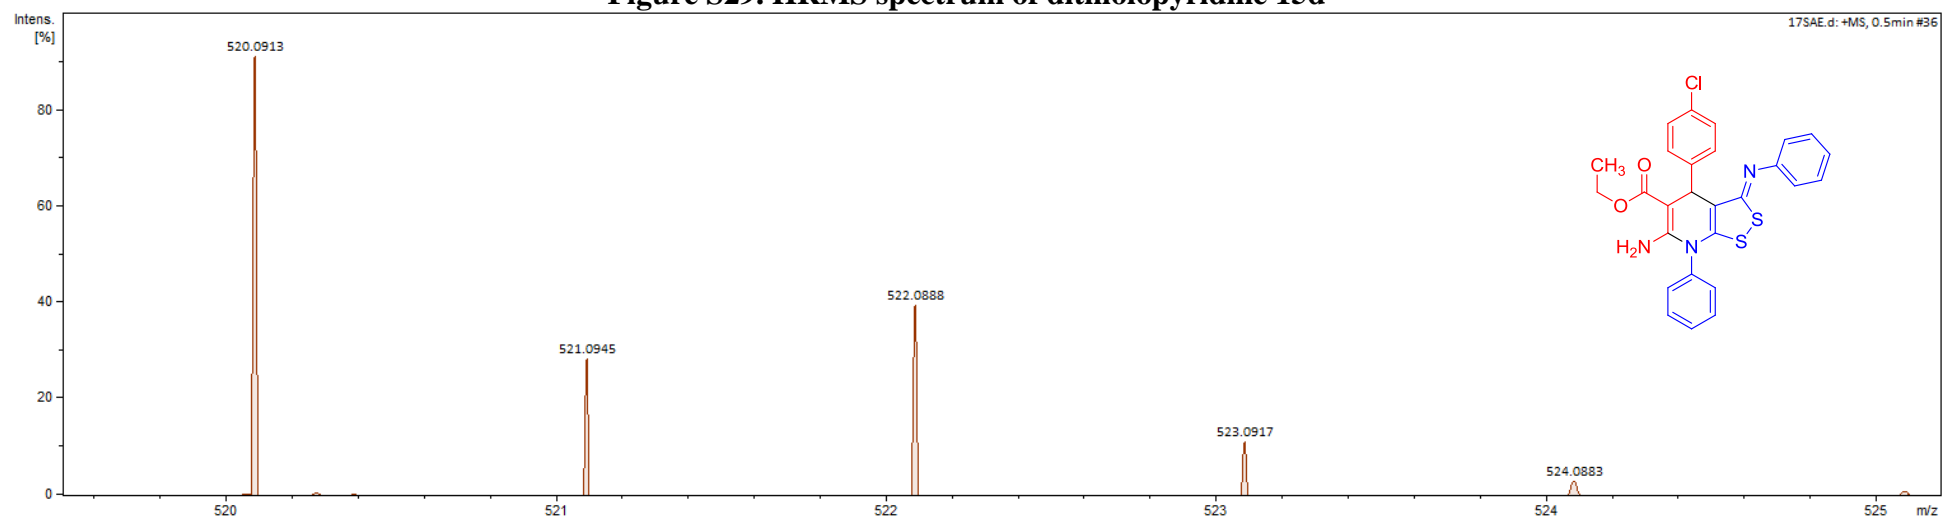

**Figure S30. HRMS spectrum of dithiopyridine 15e**

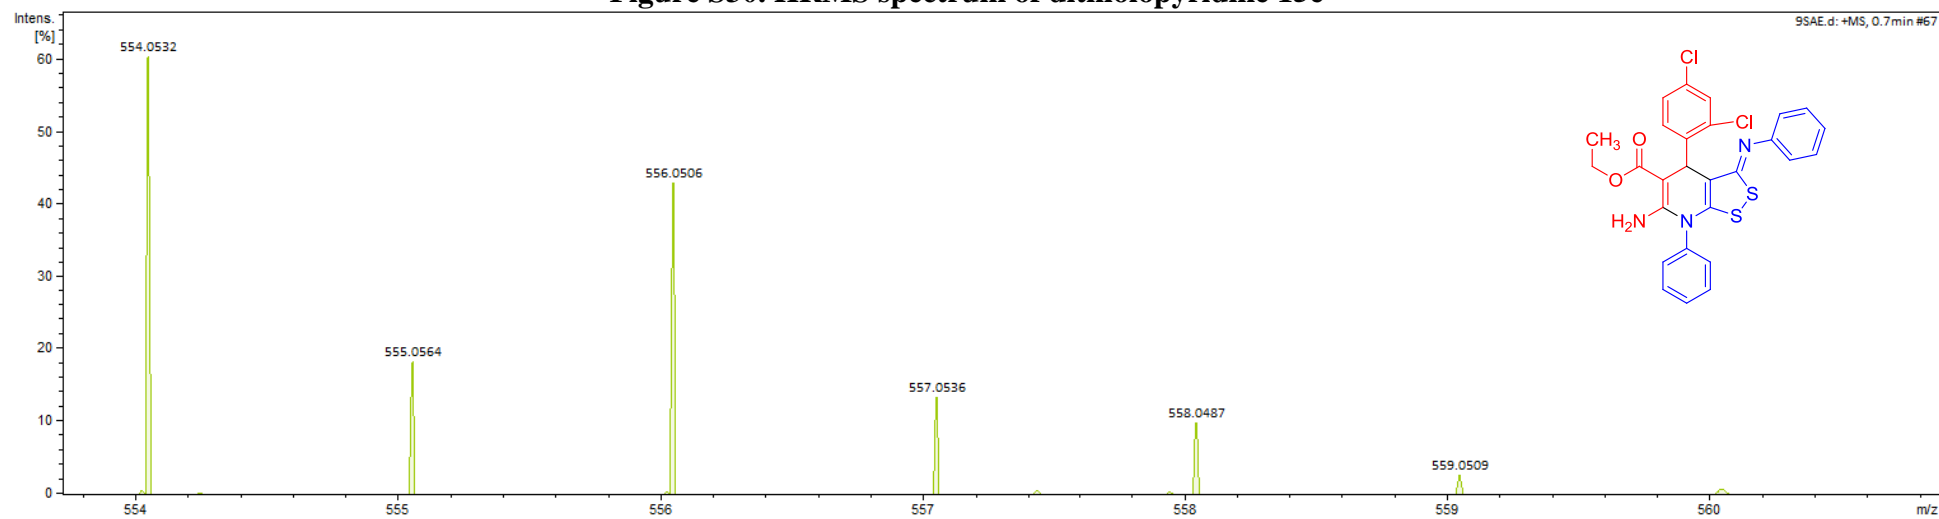

**Figure S31. HRMS spectrum of dithiopyridine 15f**

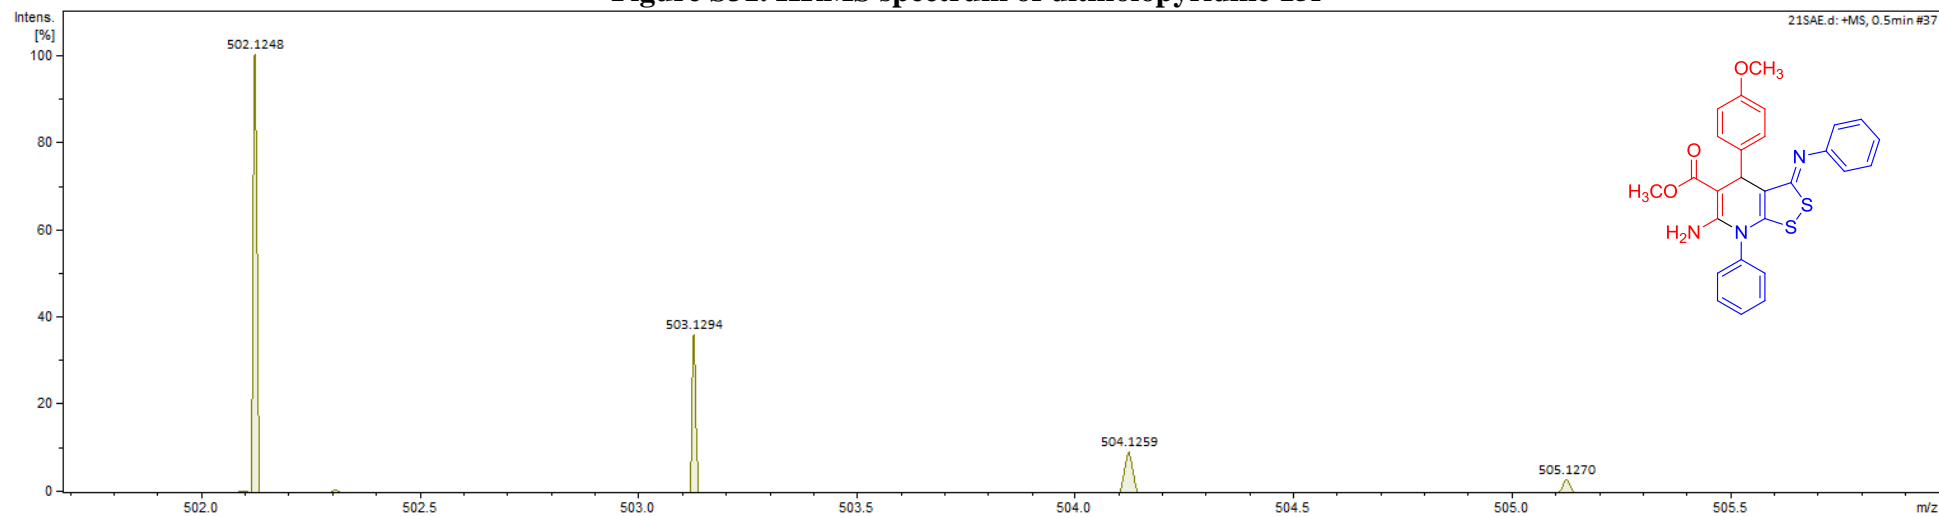

Supplement: s1 [file s1]
